# Supplementary material for: Timed Ang2-Targeted Therapy Identifies the Angiopoietin–Tie Pathway as Key Regulator of Fatal Lymphogenous Metastasis
Source: Oxford University Press journal article supplement (doi:10.1158/2159-8290.cd-20-0122), 2020-10-26
Supplement: 21598290cd200122-sup-236595_3_supp_6630052_qhw1ww.xlsx [file 21598290cd200122-sup-236595_3_supp_6630052_qhw1ww.xlsx]

## Sheet: Data
Supplementary Table 1: All significantly regulated transcripts shown in the heatmap of Supplementary Fig. S9B
	Microarray intensity
Transcript	anti-Ang2_#1	anti-Ang2_#2	anti-Ang2_#3	anti-Ang2_#4	IgG_#1	IgG_#2	IgG_#3	IgG_#4	P-value	FC
Ndrg1	1876.05	997.476	1479.03	1159.52	310.622	597.364	880.542	730.726	0.0218959	2.18798
Esm1	432.733	247.225	369.444	249.112	161.059	100.807	175.779	164.521	0.0259183	2.1564
Olfr1454	198.568	144.883	114.183	209.657	112.252	68.8788	90.6199	43.1004	0.021123	2.11939
Atf3	1617.42	1050.29	983.396	830.337	356.221	469.547	736.645	655.473	0.0374228	2.02059
Prnd	119.865	76.9656	123.52	111.482	58.2023	50.8563	54.3378	63.0902	0.0141509	1.90665
Selenbp1	1140.97	945.682	677.919	715.154	400.355	344.815	653.15	485.575	0.0256509	1.84709
Mrc1	206.516	265.96	203.252	202.24	165.675	79.6311	124.943	110.934	0.00596732	1.8246
Plp2	644.954	426.502	811.978	762.785	345.298	378.338	415.947	320.294	0.0371127	1.81263
F13a1	221.319	235.478	220.156	139.91	158.607	63.6345	131.812	102.203	0.0232956	1.79036
Selenbp2	181.949	137.425	110.309	110.622	62.704	59.1869	75.3271	119.54	0.0444447	1.70573
Rnu1b1	455.473	445.483	377.338	353.585	216.136	270.425	240.301	239.143	0.00335105	1.68931
Mir455	86.3167	105.038	58.9236	83.2351	40.571	48.8463	43.7307	66.8117	0.0301213	1.6679
Map3k1	496.486	416.597	456.374	326.759	248.914	215.922	261.914	294.043	0.0121987	1.66167
Sh3gl2	575.397	491.383	674.197	472.799	299.781	386.078	391.044	264.005	0.010041	1.65095
Cdc42ep3	254.179	229.269	192.462	167.796	111.119	96.3873	156.468	148.544	0.0153481	1.6462
Ephx2	376.355	313.909	245.167	231.089	176.994	160.196	213.199	159.022	0.0353016	1.64435
Ccl6	160.572	110.223	117.234	93.9597	71.7984	55.8314	81.5554	84.3084	0.0370425	1.64225
Slc2a1	4786.2	3404.28	3893.17	3259.45	1597.56	2239.9	2681.16	2956.35	0.0185328	1.61933
Prkab2	418.612	398.023	308.618	249.975	233.595	182.911	226.213	207.034	0.0395527	1.61839
Cyp2d22	313.936	246.541	219.322	289.087	154.551	166.706	147.653	193.411	0.0105385	1.61385
Gys1	1097.68	950.2	1033.92	812.018	574.81	553.842	645.152	641.906	0.00563533	1.61187
Dusp10	641.907	632.988	598.628	462.013	301.243	353.701	356.716	439.039	0.00623654	1.60994
Iigp1	128.719	87.6113	83.6316	105.719	57.1374	78.5983	51.9418	66.0729	0.0255123	1.59874
Slc6a15	536.233	355.252	360.318	378.422	205.383	203.081	320.839	302.236	0.0340856	1.58038
Apln	808.132	847.457	687.081	639.015	372.849	367.017	630.02	527.528	0.016685	1.57145
Lgals9	1098.81	1011.25	1020.05	834.073	643.493	593.724	787.244	503.215	0.00458637	1.56831
Gbp7	374.094	355.631	287.582	253.81	223.694	201.438	220.415	166.169	0.0191182	1.56596
Ccl9	329.068	203.528	297.446	315.198	246.357	132.953	190.408	165.886	0.0337534	1.55687
Lcp1	310.742	235.926	252.463	284.932	216.332	128.212	157.995	194.233	0.0096577	1.55584
Cblb	350.881	318.06	402.882	378.644	213.806	202.207	268.696	248.86	0.00180171	1.55368
Atf4	792.725	647.258	780.504	563.041	407.275	434.696	438.571	513.336	0.0144001	1.55168
Arg1	165.908	116.248	125.717	113.319	74.2955	81.0388	102.622	78.4464	0.0232905	1.54931
Pde2a	157.795	131.053	155.048	140.586	106.86	75.7323	97.0236	98.6434	0.00134271	1.54519
Tfap2a	735.038	652.942	602.062	432.588	444.006	254.491	454.157	422.315	0.0400301	1.53821
Enc1	556.441	483.094	460.402	372.14	409.627	238.186	273.813	297.23	0.0216876	1.53593
Mnda	162.306	163.152	143.976	151.827	91.9477	127.173	97.4465	90.0644	0.00365577	1.52782
Fbxl20	250.234	259.87	165.921	259.086	164.451	141.194	166.759	139.768	0.0324545	1.52753
Nucb1	1130.56	1022.38	1244.91	728.789	747.756	524.353	571.489	871.355	0.0453671	1.51997
Gm129	269.157	249.658	229.753	189.215	155.759	142.009	168.37	152.93	0.0143209	1.51483
Lcp2	206.393	141.947	179.241	192.367	169.619	87.9005	115.515	102.36	0.0373808	1.51442
Fam174b	111.931	95.8801	81.5427	82.4124	63.0424	67.3251	56.4222	58.9806	0.0165735	1.51266
Ero1l	1077.42	875.125	1010.27	720.267	449.079	529.715	698.555	764.351	0.0280595	1.50841
P4ha2	250.794	198.818	226.104	166.219	126.91	123.633	160.728	147.191	0.0216841	1.5076
Boc	434.354	410.886	321.717	323.337	216.775	221.441	280.749	271.427	0.0151838	1.50475
Snora23	868.722	540.283	616.45	666.816	434.673	548.248	389.137	417.535	0.0403031	1.5044
Trappc5	128.91	102.688	117.49	131.908	69.0909	95.6589	86.7726	69.2232	0.00522443	1.49962
Prickle1	304.994	216.509	243.563	197.473	139.858	124.018	169.999	208.671	0.0388022	1.49801
Tmem63a	576.883	494.83	567.913	561.982	332.723	356.906	412.683	368.392	0.00036726	1.49698
Ccng2	327.095	259.075	252.223	247.319	153.408	210.423	196.205	165.615	0.00952437	1.49619
Large	783.675	608.811	517.531	560.808	462.601	332.74	425.819	434.18	0.0311365	1.49264
Ip6k3	209.607	164.371	138.085	136.324	86.5693	103.565	107.413	137.001	0.0447098	1.4921
Cdc42	158.849	131.778	100.601	106.496	64.6671	100.071	89.7967	81.1128	0.047963	1.48287
Alg6	516.447	442.611	304.405	408.284	207.87	298.915	339.316	283.497	0.0474184	1.47995
Krt34	100.68	75.1197	84.0128	76.9533	72.235	46.16	69.0758	41.0658	0.0360196	1.47357
Rps18	282.258	320.951	284.178	194.579	170.64	232.621	175.761	156.349	0.0405453	1.47132
Mir346	95.6991	88.9672	83.4496	58.6499	54.7825	71.9505	40.3971	55.388	0.0471285	1.46849
Ets1	705.621	742.854	501.389	563.475	469.468	347.844	400.666	494.636	0.0308283	1.46755
Kdm3a	755.706	598.94	840.837	688.981	438.942	498.823	509.518	523.571	0.015535	1.46356
Aldh1l2	691.089	524.923	658.801	531.754	374.735	371.498	464.928	435.6	0.013355	1.46139
Inpp5b	198.74	196.221	205.658	177.74	158.835	142.959	107.397	123.504	0.0060215	1.46117
Ch25h	111.201	102.746	85.0969	88.3536	82.9831	59.5245	68.2753	54.6648	0.0129509	1.45941
Mtss1	855.663	760.573	810.579	700.483	482.753	471.037	554.26	642.319	0.00347637	1.45431
1700030N03Rik	80.9052	69.5703	58.0223	55.0118	36.0651	48.9886	45.1354	51.2999	0.0314949	1.45193
Snx27	696.565	647.492	484.738	535.052	477.158	340.239	367.303	444.971	0.0246176	1.45051
Kcne3	153.54	112.51	158.356	142.814	71.5769	88.722	125.049	109.675	0.0334574	1.43592
Gpx8	163.963	128.759	172.784	157.08	102.053	122.193	99.138	111.194	0.0088508	1.43262
Lonrf1	250.778	229.884	208.293	189.817	152.267	132.287	152.495	179.176	0.00839699	1.42606
Fam117b	501.713	377.355	506.691	474.622	253.176	336.598	344.829	370.305	0.0129848	1.42568
Rnf217	433.452	351.02	386.104	355.706	219.541	278.2	263.033	310.895	0.00545365	1.42421
Ighm	235.907	258.184	181.47	195.958	178.886	127.62	142.119	163.713	0.0266023	1.42326
Rcor2	181.936	145.148	173.964	147.05	92.3863	104.318	136.169	123.047	0.0119192	1.42152
Moxd1	196.326	147.63	128.955	188.811	112.292	100.504	132.022	121.176	0.0492875	1.42002
Ak4	800.888	711.89	652.851	498.612	376.312	506.396	504.378	490.182	0.0452527	1.41921
Foxj3	346.55	256.067	363.178	290.098	202.617	249.629	229.3	207.542	0.0266612	1.41256
Nr1d1	707.005	728.284	676.224	678.322	409.185	487.014	480.027	599.757	0.0103673	1.41187
Pabpc1l2b-ps	83.73	66.7647	75.0943	66.9217	36.6353	50.8146	51.1755	68.6251	0.0393656	1.41139
Ggt1	66.916	65.9955	73.8403	64.0944	46.3377	46.3131	46.863	52.7192	0.000447348	1.40895
Pfkp	3447.22	3116.31	3275.91	2508.75	2143.96	1798.05	2536.99	2289.44	0.0145012	1.40825
4632419I22Rik	124.709	145.346	121.611	124.436	87.0258	96.4343	99.298	85.243	0.00221524	1.40245
A530021J07Rik	79.1189	77.1212	60.4329	64.8289	47.5281	43.04	48.0393	63.7432	0.0218522	1.39116
Isg15	134.874	130.916	119.514	118.556	108.943	96.5318	65.8062	91.316	0.0221962	1.38959
Sp100	111.413	91.0913	90.4828	88.3893	61.9532	78.9782	72.5731	62.5148	0.00926653	1.3817
Krtap4-9	77.3288	74.2983	79.7878	64.0928	57.5693	49.5532	58.1757	49.1645	0.00400182	1.3779
Mir3098	70.7085	71.3768	61.539	56.3775	45.3828	51.2654	50.473	41.9059	0.00903919	1.37547
Ugp2	2456.53	2112.01	1912.29	1648.84	1135.98	1411.75	1826.38	1543.76	0.0487071	1.37375
Tmem106a	134.338	128.996	110.075	105.596	106.771	70.0016	98.7398	73.6268	0.0324192	1.37196
Olfml3	200.024	220.414	293.815	235.449	198.658	159.649	170.374	166.315	0.0430793	1.36648
Cyp2b19	50.2802	45.4751	50.8928	46.7208	33.2519	36.7441	36.8213	34.947	0.000399476	1.36402
Pdgfrb	171.706	164.183	186.24	179.363	159.387	101.983	115.614	137.772	0.0275044	1.36276
Tmem45a	109.026	87.8071	82.3332	74.3715	62.7951	64.5036	71.2209	60.936	0.0450921	1.36261
Polr3g	152.717	141.303	189.05	150.602	95.3883	118.379	137.806	115.016	0.0231136	1.35809
Arid5b	984.999	974.974	853.606	1012.25	557.399	915.68	626.749	722.163	0.0401738	1.35572
St8sia4	77.4011	59.7436	87.8204	79.8631	58.1368	46.156	60.8653	60.1922	0.035246	1.35269
Crhbp	64.1333	69.7641	74.4746	51.5334	50.5268	44.8807	48.4098	48.3528	0.0383729	1.35248
Fam101a	138.727	141.385	98.1412	117.99	112.178	92.9918	82.6834	79.4856	0.0454313	1.35091
Tjp1	1109.08	950.886	868.972	1138.35	666.94	848.242	741.376	758.489	0.017587	1.349
Rhox3a	77.5023	67.8799	65.5438	60.9678	48.8494	52.2218	52.1294	49.2141	0.0126073	1.34325
Cdc25c	194.494	217.886	196.45	207.706	145.491	121.168	169.57	172.401	0.0153209	1.3416
Mef2c	169.683	161.002	163.093	134.431	110.864	97.3843	119.262	140.827	0.0162058	1.34136
4933417G07Rik	59.2044	58.0397	58.2352	43.1408	40.7464	38.0888	43.4696	40.7234	0.0317556	1.341
Gm239	83.16	73.1377	69.9228	66.8762	58.7026	56.2912	50.5772	53.1403	0.00725049	1.34011
Khnyn	195.095	147.406	170.144	140.088	102.855	105.677	148.806	130.255	0.0471136	1.33869
Depdc1b	125.022	133.344	123.958	132.951	97.5779	115.603	99.6221	73.4861	0.0293145	1.33391
Hif1a	1685.43	1563.97	1837.44	1371.67	1102.66	1287.1	1008.8	1447.89	0.0271199	1.33263
AI987944	136.9	173.886	148.574	139.764	90.4974	103.593	117.02	138.685	0.0320742	1.33199
Plvap	350.816	324.005	398.283	412.593	295.132	210.345	282.243	327.898	0.0294783	1.33173
Cd68	454.492	511.845	443.744	410.365	331.017	325.067	408.251	303.767	0.0110054	1.33064
Gm6696	85.273	75.7261	85.2454	70.2395	76.3923	55.346	52.3683	53.8633	0.0325527	1.32993
Gm8842	286.735	364.397	312.008	340.671	196.399	301.87	266.902	216.645	0.0373356	1.32796
Scarf1	96.872	72.1146	102.933	94.8412	83.6286	61.3444	59.9875	71.3092	0.0420259	1.32755
Atf5	336.688	297.821	341.157	249.405	270.815	179.023	236.638	236.503	0.0388282	1.3273
Olfml2b	446.245	333.583	327.217	355.137	284.017	272.309	263.149	282.68	0.0447185	1.32666
Actn1	665.476	556.097	533.697	625.274	508.604	442.009	461.519	382.476	0.0111671	1.3265
Trav7-4	74.0781	82.7983	89.9587	93.7527	63.7467	66.8937	58.428	67.7718	0.0101442	1.32607
Kcne1l	98.4801	112.489	100.953	87.1946	66.0892	72.6873	83.5459	78.6859	0.0103691	1.32593
Fermt2	1166.78	960.174	1095.86	990.362	545.199	864.863	872.489	896.496	0.0454728	1.3253
Tap2	86.2552	86.9441	85.6662	89.4672	74.1007	54.6258	67.2409	66.8862	0.011472	1.3252
Krt27	54.0841	54.808	63.2623	56.831	44.7578	40.7838	43.6538	43.6504	0.00348051	1.3248
Olfr370	81.5445	71.6839	72.4385	78.8056	63.8489	52.7825	52.9573	60.4999	0.00244069	1.32328
Kctd9	354.261	284.519	328.343	275.889	182.777	211.158	263.695	282.578	0.0446781	1.32206
Prkar1b	86.5641	71.4287	86.768	73.0626	58.4784	51.652	59.3379	71.0047	0.0156915	1.32166
Zbtb7b	205.466	160.478	172.314	161.572	153.575	125.892	134.966	115.307	0.0202312	1.32108
Obfc2a	176.892	196.865	198.594	146.49	143.571	118.271	157.859	125.817	0.0308877	1.31772
Traf6	183.97	195.991	202.341	170.432	117.825	117.498	177.537	158.676	0.0493837	1.31704
Fau	110.781	100.942	109.797	100.554	69.3705	70.4701	100.834	80.1175	0.0332978	1.31573
Asph	136.433	119.888	114.908	97.8291	86.4055	96.8345	88.6002	84.9127	0.0326203	1.3148
Jmjd6	712.836	612.756	640.461	619.358	538.14	419.71	511.382	497.818	0.00415201	1.31436
2310022B05Rik	680.91	586.84	652.117	517.338	373.254	444.49	506.445	530.459	0.0282164	1.31411
2410141K09Rik	74.6984	55.2631	62.9417	59.7742	48.9666	46.8647	47.6523	48.9999	0.0350634	1.31272
Pla2g2c	80.8857	77.5836	81.3985	76.2258	70.8143	62.9921	56.3983	50.6342	0.0185962	1.31247
Gpr116	185.65	126.823	166.336	171.913	120.658	105.946	140.894	128.578	0.0472171	1.31174
Cxcr4	181.435	147.713	188.426	143.941	118.411	130.872	138.69	116.542	0.0328441	1.31119
Trip6	292.859	232.063	230.915	215.955	199.584	180.601	205.058	156.152	0.0352461	1.31076
Olfr572	42.7452	45.4392	38.2223	41.4667	36.3404	29.7114	31.927	30.1309	0.00345306	1.31039
Mxd1	559.071	438.212	465.206	427.22	311.931	392.943	362.721	375.238	0.0246335	1.30972
Gpr35	109.646	94.7022	95.727	86.9861	71.3005	85.6541	79.3409	59.9279	0.021347	1.30665
Tnks	443.399	356.992	411.366	499.684	338.038	329.289	283.248	360.751	0.0352624	1.30512
C3ar1	116.206	130.326	108.691	120.535	104.531	89.1897	84.4796	86.8627	0.00493526	1.30322
Pecam1	303.421	263.226	304.179	324.578	241.272	212.855	223.285	240.361	0.00627518	1.3025
Snx6	1273.62	943.625	1030.4	985.339	725.358	837.008	866.12	822.796	0.0374513	1.30195
Mtbp	248.75	242.657	246.245	220.57	146.027	182.716	222.037	185.336	0.0297866	1.30173
1600012H06Rik	167.187	158.484	178.454	167.792	115.556	127.783	155.602	117.235	0.0172972	1.30172
Rps19	103.207	112.088	90.5175	88.9269	83.6708	81.0519	71.9039	66.6484	0.0172643	1.30159
Cd47	990.291	827.707	786.456	780.621	655.237	695.768	677.158	572.573	0.0194343	1.30158
Sema4g	99.9953	120.878	113.693	94.0981	80.5188	72.7213	87.6161	88.6066	0.0185251	1.3011
2810408M09Rik	125.291	100.13	104.245	109.934	95.6558	72.7486	98.0518	71.9209	0.0325339	1.29914
Ppp2r3a	175.214	157.61	180.126	213.013	145.163	133.492	119.317	162.675	0.0329278	1.29487
Bhlhe40	3275.73	2672.98	3197.46	2756.84	1751.29	2232.97	2586.97	2632.85	0.0409087	1.29323
AI427809	76.624	61.8574	67.9257	76.8645	51.2564	52.4824	51.5898	63.8762	0.0156049	1.29227
Dbp	452.921	535.683	572.384	514.76	312.295	424.842	448.86	421.344	0.0260863	1.29142
Sash1	557.587	509.691	628.846	532.19	356.172	396.702	447.278	531.206	0.0393794	1.28703
Tmem144	367.775	352.388	321.669	343.785	297.565	248.283	261.858	270.841	0.00166767	1.28471
Hrh3	71.0349	67.4698	62.6419	67.8688	54.8789	44.8127	64.1857	45.5339	0.0398848	1.28463
Abcc1	255.36	310.763	294.89	288.582	267.801	193.595	202.21	231.467	0.0240771	1.28436
Spg21	1318.8	1317.35	1406.66	1246.15	810.76	991.65	1094.58	1221.61	0.036407	1.28416
Stc2	89.2153	70.2949	87.6644	72.7367	62.2101	55.1144	72.878	59.0801	0.031714	1.28333
Rapgef6	207.08	189.213	189.799	179.714	139.821	162.203	132.011	162.709	0.00585461	1.28331
Sertad1	219.586	195.881	190.122	168.979	126.087	144.412	175.711	158.578	0.0285562	1.28073
Rgnef	94.2662	79.1764	113.213	96.4798	74.0548	65.6731	80.572	78.9202	0.0491357	1.28045
Stau2	116.584	152.389	148.262	147.902	113.123	111.081	122.686	94.6663	0.0259235	1.27987
Mrps16	146.125	142.171	133.288	142.615	107.883	109.133	109.464	114.478	0.000287232	1.27948
Aldoc	647.655	592.491	506.224	497.244	424.355	392.031	532.22	407.623	0.0448143	1.27752
Ptrf	373.171	297.339	357.321	316.451	233.265	282.947	281.8	254.412	0.0170517	1.27732
Gm15091	72.1606	53.2563	66.2614	64.7542	51.5146	46.8834	46.7575	55.621	0.0300484	1.2772
Adamts16	54.3409	63.8938	63.767	70.0013	46.0555	53.4555	53.2345	44.9332	0.0164635	1.27481
Spry3	52.4275	69.382	60.782	65.5362	38.6102	53.0621	50.4047	52.5651	0.0367332	1.27479
Klk1b5	71.8293	67.5413	70.1829	70.5489	47.1695	64.2752	53.2757	55.2206	0.0204812	1.27353
4933416I08Rik	53.8674	41.1506	47.9223	40.4605	33.6439	36.9749	37.1351	36.2582	0.0484464	1.27351
Mir453	75.8643	59.5947	61.1501	65.5133	49.2929	52.8074	51.9618	51.7861	0.0285577	1.27338
Defa17	89.9234	82.9107	83.3801	78.6189	67.3766	50.3724	68.0467	77.3149	0.0419055	1.27259
Nos2	76.33	60.4259	59.931	68.4937	54.9747	49.8631	45.5317	58.0889	0.0279978	1.2721
Gm14744	56.8712	54.5233	58.5794	52.5636	43.8148	50.7417	44.237	36.1623	0.0206252	1.27196
Supt5h	718.406	696.244	620.983	553.414	443.66	459.025	524.401	609.745	0.0412505	1.27112
Jmy	596.177	488.99	570.99	464.051	356.484	425.42	438.716	448.064	0.0296854	1.27059
Fcamr	73.6939	62.6794	59.7726	59.1959	55.2792	48.1063	50.5411	47.3591	0.0193094	1.26855
Chac1	128.12	121.897	112.492	95.994	85.9089	74.6912	102.283	98.8512	0.0429186	1.26751
Dgcr14	271.813	247.764	258.996	218.824	179.062	167.665	241.949	198.414	0.0427979	1.2672
Gm19763	54.3411	55.7686	56.6077	58.3456	46.4017	37.6915	41.8646	51.6794	0.0248354	1.26698
Gm428	59.0697	47.1716	54.2346	58.9199	41.0056	47.987	37.8783	46.3244	0.0201733	1.26675
Cpeb2	187.086	152.69	194.019	157.21	144.201	145.031	118.994	137.444	0.0309658	1.26634
Ifi203	75.056	62.5286	64.4027	65.2231	56.1874	44.2343	59.3127	51.2789	0.0180674	1.26632
Barx1	102.902	108.267	90.9955	94.6474	66.6464	71.5729	92.2507	82.9686	0.0282551	1.266
Ptpn21	333.585	297.022	321.226	300.975	268.189	271.923	227.546	222.039	0.00796849	1.26585
Sdcbp2	79.5089	71.5335	73.7974	64.4137	60.6741	60.9574	52.0252	54.9288	0.00914087	1.26541
Lmo7	158.105	161.261	153.901	144.799	118.521	108.121	132.998	129.574	0.00462265	1.26339
Il1r1	96.358	79.8733	96.7487	102.08	71.8525	72.5737	74.4285	78.0972	0.0225673	1.26303
Btbd9	256.893	293.213	314.898	275.657	216.988	197.453	241.497	247.287	0.0127483	1.26288
Mprip	101.698	87.59	95.636	76.035	62.8138	80.522	62.7832	80.2604	0.0481693	1.26042
Kif21b	266.804	207.424	239.126	225.024	219.451	183.506	178.792	162.798	0.0313853	1.26034
Plekha2	443.643	472.224	462.815	391.633	316.552	337.992	384.385	365.779	0.00846202	1.26027
Dip2b	907.097	773.172	900.405	770.293	658.539	736.872	638.362	625.238	0.0119173	1.26023
Clcn5	317.656	283.824	315.513	277.308	210.192	231.774	236.711	269.36	0.00912884	1.25976
Klhl3	151.865	153.786	148.436	117.625	128.884	105.386	119.595	100.286	0.0360996	1.25886
Cd53	195.752	164.085	185	188.521	153.701	145.534	159.852	123.555	0.0117221	1.25868
Gm4883	52.4007	52.3851	59.7426	60.2586	40.9796	43.7446	46.9401	47.0793	0.00660759	1.25759
Hspa4l	311.451	344.311	281.278	288.471	229.812	227.35	257.677	260.08	0.0132071	1.25704
Tiparp	53.6892	58.0884	55.7435	60.7666	43.8059	47.6531	44.8955	45.3975	0.00154722	1.25604
Gjd3	106.231	124.773	133.457	106.158	83.4512	110.817	92.9197	87.651	0.0399082	1.25552
Cdk20	112.594	123.163	136.914	114.013	97.1161	93.8608	103.051	94.2927	0.0159829	1.2533
Tnfaip3	165.832	161.379	142.035	138.901	98.3607	137.489	122.878	126.545	0.0294104	1.2532
Cln8	63.5933	72.5473	53.1841	61.6543	47.4773	52.5667	54.1513	46.2949	0.0418459	1.25183
Rras2	136.843	167.206	136.178	172.907	131.488	127.091	107.862	123.533	0.0425911	1.25136
Arih2	825.494	776.627	877.256	696.058	582.624	587.673	697.788	672.2	0.0185976	1.25003
Pik3r6	68.3704	68.5723	72.0275	87.1071	59.592	52.6871	60.6078	64.0807	0.0360982	1.24944
Olfr856-ps1	42.2459	50.8181	42.3491	43.9573	33.1385	37.0352	37.2556	36.185	0.0144258	1.24897
Adam9	1134.61	1138.04	1121.7	1072.24	1070.76	780.077	909.061	816.455	0.03798	1.24892
Zfp867	93.1041	79.1632	73.6256	70.0736	58.8664	67.0618	63.6573	63.441	0.0469721	1.24875
Ocstamp	71.0683	77.4096	74.1437	68.7291	49.1265	60.0498	60.6382	63.7287	0.0120213	1.24752
Mkrn2	314.099	293.736	361.469	325.359	210.358	266.086	272.944	288.513	0.0285382	1.24739
Samd3	53.1954	53.5297	49.1459	53.6943	42.3342	48.558	39.6955	37.4321	0.0156147	1.24727
Gm14316	67.0916	61.1811	62.7802	50.9643	52.4705	52.3608	44.6297	44.5782	0.0311441	1.24726
Mfhas1	77.8993	75.8745	76.264	71.7167	59.6668	69.3561	47.8716	65.1562	0.0443703	1.24666
Cul4b	662.027	559.045	517.046	516.283	389.787	520.474	443.166	456.727	0.0457306	1.24542
D19Wsu162e	784.987	810.64	757.672	724.011	640.023	710.596	535.885	584.547	0.0191317	1.24535
Cc2d1b	205.109	211.553	212.63	220.742	172.042	135.14	181.55	193.868	0.0414249	1.24529
Bpifb5	60.3602	58.1607	56.8497	54.2622	45.454	46.0266	46.8047	46.1962	0.00227041	1.24475
Smurf1	488.623	451.706	498.732	471.711	375.594	346.013	401.494	412.166	0.00278131	1.24459
Syce1l	65.4043	55.1982	59.0265	48.1115	42.5121	45.1791	51.5479	43.8043	0.0456631	1.24419
Snph	118.558	110.022	107.879	102.928	94.1041	101.638	87.9801	69.4316	0.0436416	1.24418
Cdkal1	348.913	292.975	314.36	315.436	201.894	279.605	275.681	265.508	0.0334805	1.24347
Egr1	137.159	153.912	148.772	117.153	123.132	119.278	102.579	102.987	0.0368837	1.24336
Tex10	327.728	257.194	279.803	329.073	252.585	250.067	246.267	211.338	0.038437	1.24321
Bpi	49.5055	54.6085	55.4881	53.5262	38.555	43.9607	46.2733	42.765	0.00280669	1.24234
Copz1	91.0243	100.585	110.923	94.4036	84.0118	81.8074	78.9484	74.796	0.0143466	1.24212
Ptx3	64.4193	57.9587	62.7086	59.0647	47.2787	47.7887	57.6131	43.9369	0.0189727	1.24176
Foxi3	61.3171	65.2088	64.7338	55.9842	45.2572	49.1389	54.2991	50.4952	0.00561438	1.24124
Wwc2	307.961	242.14	283.578	245.404	199.573	244.003	196.304	229.897	0.0405914	1.24064
B230209K01Rik	60.0526	62.9147	54.8361	57.3529	46.4402	48.9662	54.9727	39.2928	0.0304909	1.23981
Arhgap27	73.2886	61.3109	74.0431	64.4552	46.7017	54.2607	59.2667	60.2033	0.0250454	1.23892
Mmp9	69.1169	61.2804	70.5709	60.0603	49.9492	49.833	48.6447	62.3012	0.0248887	1.2387
Morf4l2	179.605	176.922	167.671	186.649	143.813	158.771	121.974	149.868	0.0146397	1.23749
Slc22a16	71.5281	59.882	67.4614	68.348	56.8532	57.0003	50.9792	51.111	0.00683681	1.23745
Gm13871	57.8176	62.9066	63.1958	58.2386	50.7764	45.9876	51.4432	47.5019	0.00105541	1.23734
Acbd6	249.356	255.415	206.771	226.522	166.303	197.031	218.493	176.334	0.0312739	1.23729
Klf16	184.093	203.203	211.15	180.996	157.904	163.915	140.57	168.237	0.00842482	1.23598
Bglap-rs1	62.4464	54.194	50.3752	60.4267	50.3606	41.2071	49.1147	43.4049	0.0240057	1.23551
Parp6	234.064	208.942	239.384	185.909	182.882	163.364	182.421	174.128	0.0370166	1.23549
Cstf2	182.719	179.147	186.764	174.12	125.779	131.945	156.232	171.931	0.0458441	1.2336
Myo1g	80.9377	82.8107	88.7033	75.75	77.1104	68.4613	55.3229	65.1781	0.0321963	1.2335
Dnahc7b	71.0836	88.3816	84.0121	87.747	57.9743	67.0973	69.0944	74.8064	0.0272488	1.23144
Lars2	181.577	234.461	230.39	210.748	166.043	184.092	179.769	166.571	0.0377426	1.23073
Dhrs4	462.611	504.558	471.717	408.161	343.141	380.602	390.416	386.877	0.0145921	1.23051
Clec4d	72.2104	58.5214	63.1161	58.0987	46.2835	56.6715	46.118	55.9157	0.0372528	1.22908
Olfr1228	39.4113	39.2007	41.2524	40.2887	31.6014	33.3737	32.6058	32.7664	2.37819e-05	1.22867
Arxes2	45.4757	53.6154	44.2428	52.1256	40.94	37.3559	40.9907	39.8225	0.0242246	1.22846
Pik3ip1	143.933	136.813	129.19	123.096	108.531	110.507	103.873	111.045	0.00797447	1.22831
Fhl2	125.751	104.677	102.569	116.713	97.9416	83.0068	90.1422	95.3751	0.0223199	1.22716
Slc16a6	89.7244	94.8677	91.6653	107.039	74.2766	66.9837	84.7662	86.4362	0.0265321	1.22669
5031414D18Rik	58.7507	64.8838	59.7029	63.7171	46.668	58.0599	54.6142	42.0671	0.0446642	1.22663
Cpb1	46.8196	47.0906	45.6538	45.0987	41.2463	37.9307	39.3017	32.0752	0.0198646	1.22655
1700066M21Rik	162.346	172.198	183.264	147.926	115.252	149.334	144.878	133.876	0.0285574	1.22526
Angptl6	97.3689	101.776	111.914	117.685	93.7054	96.7597	75.5986	84.0118	0.0259234	1.22472
Tnpo1	1057.96	1032.62	1198.59	1095.43	771.788	869.402	961.099	978.131	0.016908	1.2246
Ces2d-ps	76.2366	68.2714	79.7898	72.0322	58.1279	70.5726	58.6442	54.8155	0.0217189	1.22369
Dnajc5	622.995	619.778	647.511	548.237	477.505	478.653	514.715	523.333	0.00716789	1.2228
Zfp106	78.3204	70.1938	75.3004	64.9283	59.7485	66.1784	57.247	52.989	0.0173814	1.22264
Myzap	87.0037	79.593	74.3672	68.745	60.8695	68.9399	57.9566	65.6992	0.0276292	1.2219
Gm19276	51.1552	52.2111	45.2126	48.329	37.838	48.0517	36.4014	38.9501	0.0342974	1.2212
Parp14	167.736	165.518	201.318	157.298	151.817	151.976	134.373	128.445	0.0407351	1.22107
Svs3b	43.769	44.0339	45.3793	43.8314	39.0106	37.3436	33.2546	35.3597	0.00516193	1.22105
Ssh1	117.107	100.493	102.8	103.597	89.4283	76.6634	94.6859	86.5162	0.0114522	1.22086
Cdc45	156.26	155.821	166.409	157.314	116.097	124.307	140.498	139.941	0.0115454	1.22072
Arhgef25	201.381	172.147	155.923	169.571	153.394	147.311	132.912	139.157	0.0373037	1.22042
4930480M12Rik	47.2839	39.2101	46.277	37.8385	35.3436	32.2073	36.5308	35.8044	0.0424344	1.21963
Rnf125	100.241	88.6092	92.0692	94.1285	84.2226	75.8174	67.9828	79.7868	0.00901188	1.21844
2310003F16Rik	128.468	111.135	136.537	122.242	94.998	111.844	103.935	98.5028	0.0169405	1.2177
Tpk1	94.3769	109.303	97.2259	84.7782	65.7219	86.9023	82.4552	81.7622	0.0462258	1.21728
Sesn2	121.757	107.936	120.275	110.486	84.3681	103.885	88.3424	101.873	0.0162523	1.21662
Psg16	57.6763	49.5156	48.1153	48.7595	39.903	46.7091	38.0023	43.1617	0.0222965	1.2163
Parp12	347.083	382.252	396.926	344.03	285.91	304.942	340.517	277.957	0.0143212	1.2158
Sgms2	147.167	147.775	121.721	119.339	118.142	102.535	111.087	109.318	0.048207	1.2152
Atf1	209.879	185.027	213.974	182.986	152.786	161.403	181.86	155.671	0.0162921	1.21504
Slc6a6	1408.98	1253.52	1162.17	1262	1014.21	1060.42	929.787	1184.41	0.0226599	1.21434
Apoa2	114.969	97.0498	104.879	101.886	87.7848	83.9722	76.4855	96.7278	0.0175366	1.21397
4930461C15Rik	56.5533	55.6611	53.3825	61.3945	46.6219	53.9712	39.6443	46.8143	0.0332667	1.21352
Usp3	290.667	276.138	290.205	277.987	249.581	206.425	237.839	241.572	0.00827779	1.21336
Olfr584	90.1736	79.2946	82.7217	96.5134	66.4759	74.4254	72.4932	74.4627	0.0206936	1.21138
Gm16050	111.905	98.1191	97.2517	86.6968	91.2917	80.0429	80.0375	73.9008	0.0387428	1.21121
Ctxn2	56.4438	49.2052	50.2945	45.6724	45.3046	36.9469	45.8411	38.393	0.0340952	1.21101
Kdm2a	810.973	777.753	966.181	893.216	622.346	701.362	732.962	790.972	0.0354902	1.21087
Zscan21	215.881	202	185.531	214.981	153.016	172.707	187.779	162.913	0.0135387	1.2099
Vmn1r61	32.4573	35.6491	38.5514	34.1184	29.0222	30.5338	30.1024	26.6969	0.0102134	1.20988
Ptk2	72.5232	57.3328	60.005	64.3796	50.4724	51.4985	52.7105	55.4928	0.0393435	1.20967
Spats2	781.909	736.73	753.588	679.449	575.172	589.755	667.846	608.785	0.00515224	1.20893
Gm3696	62.2523	63.2207	61.7796	63.2303	47.1913	55.8847	51.5146	52.611	0.0077419	1.20888
Il20ra	57.4036	64.9475	56.034	52.5374	41.9398	52.8469	45.1407	51.114	0.0341494	1.20876
Ccl4	86.3246	68.9146	72.5308	69.6282	59.0278	58.3414	64.3444	64.3257	0.0435903	1.20874
Arhgef6	85.0784	81.8314	69.6493	81.4389	67.2399	59.5452	69.6845	66.6694	0.0183679	1.20848
Cyp2c70	49.8977	47.4847	52.1645	49.5755	42.4709	43.5959	37.5488	41.1734	0.00244951	1.20835
Kcna4	42.9135	47.7805	51.42	48.9052	42.0659	38.3123	40.1035	37.6678	0.0114683	1.20784
Ctsw	72.6726	74.9562	67.9706	74.7406	58.8762	60.5142	63.7929	57.234	0.00121279	1.20765
Sdad1	340.332	280.216	337.099	299.483	226.246	242.041	291.877	280.926	0.0451827	1.20751
Zcchc11	423.888	416.872	449.744	415.717	328.528	393.601	329.802	361.153	0.0104845	1.20744
Pum1	463.662	481.628	516.299	522.32	371.232	403.066	418.69	450.772	0.00821076	1.20693
Amy2a5	49.2332	58.074	53.2979	48.3096	44.0484	36.7476	48.9131	43.3965	0.03737	1.20686
Ttc24	57.2114	60.0007	53.8414	47.552	44.4561	38.6454	48.0223	50.0379	0.0433889	1.20669
Gm19765	43.849	53.9714	53.2539	52.558	49.5011	40.7186	40.4003	38.2027	0.0448778	1.20619
Gm10354	75.2897	71.1564	75.9508	67.003	60.2476	55.442	65.4087	58.9161	0.00558336	1.20576
4930483J18Rik	51.9196	55.9965	56.8014	44.7584	39.2183	45.1248	46.5828	42.8859	0.0395724	1.20519
Rc3h1	627.204	585.553	731.008	633.893	502.487	553.331	488.609	594.76	0.0332397	1.20497
Hcn1	701.834	801.221	774.487	660.623	695.721	566.475	617.829	560.328	0.032762	1.20399
Smad7	119.323	111.064	120.752	115.971	93.025	110.783	96.1179	88.1353	0.0195632	1.2037
Olfr1412	48.1159	47.2944	45.1869	54.228	41.2451	39.6812	42.0637	38.8676	0.0179553	1.20368
Ahsg	72.954	63.1148	63.7808	57.623	55.7885	55.2424	50.4089	52.5214	0.0344557	1.20336
Oxsm	77.0139	84.1928	79.9166	65.7972	60.7395	65.568	60.5176	68.2347	0.0373061	1.20333
Npepps	589.152	532.516	514.445	515.108	424.667	477.782	425.761	460.277	0.00730728	1.20282
Serpina1a	43.5995	49.4702	49.2421	46.8339	44.5314	39.8133	39.6529	33.2811	0.0321991	1.20262
Clca5	54.1263	58.329	59.5173	52.933	41.2007	50.0063	48.7201	47.108	0.0100304	1.20248
Foxred2	153.826	145.064	138.463	140.312	130.282	113.873	117.571	118.71	0.00264522	1.20238
Mogat1	73.5068	59.4077	63.4883	62.4057	49.6958	53.5213	55.4395	56.6311	0.0292294	1.20215
Sf3b1	1412.33	1325.46	1470.33	1440.95	1029.29	1334.77	1225.77	1109.46	0.0296521	1.20211
F2r	162.082	148.089	157.148	155.09	143.181	106.669	129.686	138.297	0.0416037	1.20195
Uhrf1bp1	211.2	221.26	223.51	200.296	177.995	166.143	195.475	172.904	0.00501152	1.20175
Gjb1	79.2788	65.8784	62.3835	65.6723	54.0847	64.4113	53.9171	54.984	0.0498694	1.20148
Neurod6	46.5857	45.3286	45.0739	44.301	39.7712	35.6344	40.9201	34.6018	0.0122277	1.20117
Rbpj	445.216	359.531	370.225	373.77	298.89	303.24	355.172	333.12	0.0389803	1.20018
Aifm3	65.028	61.7561	62.3046	58.0468	49.7679	53.5314	56.336	46.3768	0.0100983	1.19962
Adam26a	41.7269	37.8535	36.6898	35.9555	30.4279	33.4405	31.0449	32.0565	0.00927258	1.19891
Gm20077	56.517	56.5681	57.4365	67.7607	44.2394	49.0326	48.032	57.5335	0.0455721	1.19838
B230216G23Rik	72.1516	66.0401	72.327	57.8371	60.2358	51.0116	60.3635	52.3555	0.0428225	1.1982
Zbtb44	257.581	222.874	289.13	258.246	211.566	195.56	216.169	234.634	0.0439577	1.19804
Gm12887	53.2056	49.386	50.0322	44.0897	42.8663	37.9458	43.8833	39.5073	0.0153983	1.19799
Gm10573	53.2056	49.386	50.0322	44.0897	42.8663	37.9458	43.8833	39.5073	0.0153983	1.19799
Uts2d	48.0811	45.2559	51.8907	42.3992	41.0455	40.0907	36.5118	38.9704	0.0230917	1.19799
Cbln2	64.5937	73.5491	61.6689	62.0899	50.5074	56.5879	61.0583	50.4648	0.0288553	1.19799
Cd300lb	60.9849	61.2278	67.8492	57.6013	47.084	58.9375	51.8773	48.8741	0.0242829	1.19775
Inpp4a	186.37	170.479	167.294	185.326	150.369	158.454	143.734	140.397	0.00418493	1.1965
C1galt1	558.12	592.3	548.247	544.838	398.478	533.444	464.48	479.145	0.0380402	1.19619
Chsy3	276.12	272.067	244.099	219.477	226.979	199.413	200.357	219.208	0.0435895	1.196
Gm9731	59.4527	52.6004	52.269	56.1912	51.5146	45.0193	44.196	43.6476	0.0111418	1.19599
Atg14	173.586	168.477	164.08	154.863	128.977	156.303	145.406	122.129	0.031123	1.19571
Il7r	52.1968	51.455	47.282	55.8811	42.4155	39.1995	47.5115	43.8491	0.0139549	1.19563
Olfr437	48.7829	42.5685	50.5672	50.9303	38.3208	38.6586	39.2876	45.0525	0.0209666	1.19545
5830416I19Rik	79.4594	76.9388	69.7948	69.0339	70.9986	55.8302	63.7232	56.4586	0.0372828	1.1952
Ubxn7	585.83	493.626	476.08	468.943	393.493	450.124	395.976	454.708	0.0485759	1.19488
Dmrta2	171.383	151.535	148.448	141.916	139.773	114.774	128.473	130.319	0.0235275	1.19469
Mir1946b	41.2723	45.551	40.2848	41.1404	31.6701	40.7197	34.6926	33.8107	0.0300151	1.19416
Vwce	74.9764	68.1373	72.8421	70.9009	52.1404	64.4145	65.3817	58.3536	0.0238291	1.19379
Ghdc	173.733	167.267	178.146	156.658	135.493	131.151	158.188	141.481	0.0120611	1.19334
Cables1	50.7418	49.8301	47.3169	43.0313	41.1129	42.7162	37.2765	38.9722	0.0127994	1.19267
Gm16291	53.7589	43.214	51.0166	45.0369	41.3642	37.3349	39.4107	43.8353	0.0436464	1.19193
Rab3gap1	396.255	357.882	399.493	333.18	279.442	310.217	338.497	319.402	0.0269216	1.19177
Tbc1d20	732.056	654.987	681.657	622.222	541.046	498.669	585.975	632.492	0.027922	1.19163
P2rx6	53.3857	62.9877	62.121	54.4087	55.5512	46.9726	48.086	44.9789	0.0343106	1.19078
Ptger3	65.243	63.4807	57.3298	62.3231	44.6653	51.396	57.1232	55.633	0.029507	1.18944
7420461P10Rik	57.7368	47.9755	47.8418	49.6932	43.4616	37.6373	44.8519	44.9509	0.035244	1.18926
Fbxo42	254.541	268.505	298.13	274.28	218.668	253.211	222.804	226.605	0.0113309	1.18905
Bicc1	231.62	250.212	284.37	247.686	207.102	201.762	212.169	231.997	0.0271956	1.18857
Ing5	155.684	131.395	152.985	149.639	124.537	111.091	125.084	135.554	0.0201914	1.18828
4930588N13Rik	46.655	51.6178	46.2009	51.0776	39.9036	40.1669	44.7736	39.856	0.0065127	1.18732
Ptpre	70.696	85.1468	82.9526	83.2284	69.8616	62.2787	63.4169	75.6832	0.0314166	1.18723
Ythdc1	569.123	523.284	621.445	548.683	452.435	476	508.458	469.055	0.0150326	1.18709
Casc3	189.575	196.626	222.434	197.692	168.685	177.215	161.417	172.089	0.0143384	1.18681
Tmem39b	240.528	273.425	239.61	272.283	209.382	196.474	251.099	207.486	0.0405759	1.18672
Gm19522	51.0728	58.603	51.1618	56.5214	44.2576	46.8921	45.6592	46.4088	0.0166409	1.18634
Pfkl	1635.84	1496.39	1601.21	1341.03	1270.16	1093.34	1407.76	1349.72	0.0462926	1.18619
Gm13315	54.1197	56.1627	55.5489	55.9586	49.375	47.9433	39.4208	50.2647	0.0373847	1.18602
Clec2e	59.7203	49.8752	57.9839	57.0531	44.9277	45.8027	51.1112	47.5642	0.0181074	1.18599
Cebpg	326.683	279.374	328.347	300.282	255.111	272.66	235.372	278.287	0.019918	1.18557
Fbxo21	371.848	366.941	423.563	388.867	313.609	331.241	300.927	362.727	0.0170082	1.18549
Pecr	86.001	81.1715	86.2235	84.7122	65.4878	63.6063	76.8989	79.2287	0.0390694	1.18542
Mir327	50.4078	46.6586	46.784	49.3823	41.6885	39.1853	38.791	43.35	0.00196657	1.18537
Gm19299	62.1123	53.6758	53.2511	59.5902	49.6279	53.8212	45.5644	43.8757	0.0288102	1.18529
Gm12814	41.0312	42.2509	42.0314	40.0275	34.0571	34.8407	34.9297	35.7354	0.000101918	1.18471
Gmip	105.758	104.446	96.4901	110.682	86.9097	89.5007	85.1748	90.7749	0.00678422	1.18451
Fancl	113.818	105.889	117.738	112.955	81.9844	107.377	89.0607	101.845	0.0492092	1.18443
Appl2	937.463	850.309	957.929	851.665	674.67	789.853	767.717	805.193	0.0137774	1.18434
Pdxp	170.544	186.578	159.019	158.469	126.816	138.731	164.563	139.535	0.0451607	1.18426
Fggy	178.528	171.679	168.737	157.586	128.826	148.333	157.036	137.137	0.0158048	1.18413
Rbm22	567.334	505.7	505.292	478.969	400.261	434.593	474.983	428.124	0.0175347	1.18374
Gm19576	61.2222	60.4174	60.8539	53.4228	48.7179	47.7563	52.5303	50.3265	0.00886565	1.18354
1700006A11Rik	43.391	40.4778	44.6796	43.707	36.1943	36.661	32.8994	39.7961	0.0100536	1.18347
Foxp3	66.1841	63.6671	72.244	57.3852	55.2775	49.5647	60.6038	53.8995	0.0426512	1.18298
Ercc5	289.274	248.873	287.728	242.809	220.496	243.021	226.926	213.483	0.0361303	1.18227
4933407I18Rik	54.5095	53.0902	51.227	44.9014	44.0702	43.3675	43.1256	41.915	0.0317913	1.18118
Raver2	69.3536	56.9097	71.4004	63.4486	51.8688	54.3141	60.6187	54.4051	0.047207	1.1804
Gm19304	72.3889	58.8207	66.7682	61.3142	56.0289	60.1895	54.1406	49.3392	0.0421336	1.18022
Elp4	162.573	175.862	169.877	141.091	132.914	126.749	143.065	147.59	0.039176	1.18005
Gm4166	51.0063	46.7938	44.5213	48.3141	42.1428	45.5912	38.6313	35.1859	0.0396999	1.18003
Wt1	72.9598	71.6778	68.2368	64.0857	52.1062	53.5928	65.0109	64.0401	0.044968	1.17981
Fgd3	71.1974	65.391	69.7	71.2906	60.4316	58.6379	56.7876	59.4695	0.0014457	1.17955
Nynrin	174.174	199.731	175.684	183.286	160.657	132.829	160.266	167.991	0.0311166	1.17874
Flrt3	64.0112	63.5002	60.0527	58.2193	57.8616	55.0506	49.1281	46.5976	0.0285176	1.17804
Zfp507	48.1398	43.7313	46.1456	41.4443	39.4923	35.4634	40.6831	36.7023	0.0122062	1.17802
Vmn1r159	144.449	134.236	133.911	122.459	122.802	126.325	104.977	100.18	0.0472251	1.1778
Sfmbt2	56.6101	52.0629	53.2097	52.3722	43.4063	48.5356	44.2299	45.8248	0.00197063	1.17725
Jun	1064.53	926.146	937.029	983.991	911.984	694.131	842.395	874.685	0.0480704	1.17709
Ms4a4a	55.7663	62.4985	67.5703	65.6923	49.4562	52.7668	50.3172	61.2955	0.0456581	1.17626
Nlrp4f	42.6233	42.3497	39.6157	36.252	32.6063	34.536	37.417	32.1863	0.0206854	1.1762
Wdsub1	109.473	134.108	125.119	134.09	96.2684	108.693	118.098	104.468	0.0455992	1.17604
Upk2	74.3285	64.2145	69.6219	74.5998	57.2594	62.3582	63.3613	57.4934	0.0143245	1.17587
Sun2	74.8005	69.7916	69.8687	61.3379	52.2451	62.2884	60.6514	59.5438	0.0297951	1.17497
AI314180	502.406	452.691	515.727	454.909	382.457	401.723	411.425	443.443	0.0143549	1.17491
Exosc10	589.96	551.645	545.403	530.598	496.029	421.851	526.238	443.516	0.0319588	1.17481
2310030A07Rik	45.196	48.8745	49.7858	42.0556	35.4643	41.1002	40.3167	41.3785	0.0236799	1.17473
Olfr1431	42.1585	38.1622	40.7693	39.6794	33.4238	38.2601	30.4844	34.8701	0.0261092	1.17317
Psme4	766.084	787.089	714.883	672.302	652.571	669.67	555.351	628.886	0.0238461	1.1731
Aldh18a1	302.731	323.797	310.563	303.749	257.713	258.044	285.293	256.993	0.00235644	1.17277
Lrriq3	56.5742	60.7246	51.6618	50.6089	49.0738	48.1732	46.0108	44.0261	0.0323117	1.17239
Tbc1d23	415.981	394.701	350.023	344.948	306.295	322.712	344.527	310.903	0.0409109	1.17223
Rpl10	3147.78	2784.48	2920.06	2516.23	2218.06	2374.99	2553.08	2553.53	0.0432279	1.17206
Arsa	309.717	287.405	285.358	253.43	243.278	230.732	227.446	267.889	0.0321516	1.17183
Slk	444.391	444.338	480.68	465.09	389.375	397.932	356.004	422.253	0.00865486	1.17178
Xpnpep1	1206.07	1217.87	1377.25	1401.13	1016.51	1060.27	1173.19	1190.8	0.0302655	1.17149
Vnn3	50.8666	54.7283	48.0482	46.2237	39.2877	40.7707	49.1705	41.3851	0.0457937	1.17146
4930502E18Rik	50.8707	58.9507	62.2422	60.2813	45.9944	45.8872	56.0965	50.3893	0.0499971	1.17129
Gm6260	49.9753	47.2139	43.3516	45.026	42.352	39.2471	35.9821	40.8964	0.0142139	1.17093
Samd7	59.6721	53.0351	58.1087	48.5617	48.497	47.1179	46.1797	45.6177	0.0469125	1.17056
9430041J12Rik	51.3605	53.5385	55.8458	44.4321	44.8408	42.1002	42.1018	46.2488	0.0486562	1.17049
Olfr1012	50.151	42.5441	42.5722	42.713	39.7608	34.9197	40.9668	36.4629	0.0361425	1.17007
Art4	66.9761	61.2737	57.6083	60.6242	50.2075	50.6701	53.226	56.5855	0.0120626	1.16989
BC005512	50.7754	50.5839	45.8076	48.7986	45.013	38.9908	41.6787	41.8579	0.00564483	1.16966
Krt74	53.1883	54.3038	45.2573	46.774	39.431	44.5023	45.4762	41.2305	0.0422201	1.16926
Kcnq5	183.758	195.696	190.898	158.528	149.725	152.112	163.831	157.74	0.0427353	1.16918
Ripk2	235.679	210.45	240.053	197.097	194.03	173.271	183.045	205.194	0.0468979	1.16907
Slc5a6	86.1402	93.9116	92.0059	94.0003	77.6242	79.1622	75.9533	80.4495	0.00206319	1.16881
Pomt1	210.656	227.2	226.342	237.762	206.682	198.252	179.518	187.302	0.00736392	1.16872
Ly75	56.4413	56.0314	50.2554	49.0688	49.9017	45.7809	41.8549	43.6909	0.0255267	1.16867
Olfr701	52.6967	49.1082	43.4434	48.9721	45.437	37.2738	43.8417	39.641	0.0397826	1.16864
Plod1	3394.49	3254.61	3155.37	2907.96	2957.67	2513.85	2835.85	2585.77	0.0208403	1.16701
Cd207	72.5584	64.5713	74.9074	63.3174	56.1412	58.0821	61.9599	59.8269	0.033971	1.16671
Rnf39	64.8948	75.1446	61.381	72.1516	56.4624	55.3886	57.5296	65.1125	0.0497083	1.16665
Pabpc5	50.8324	44.6561	50.1119	49.6919	42.0731	44.046	38.1658	43.2138	0.0111695	1.16593
Tyrp1	7755.55	7357.44	6523.36	7342.06	5534.83	6087.44	6225.24	7010.75	0.0428645	1.16575
LOC100505283	67.4259	71.6954	61.9299	67.7908	57.1921	61.7559	54.4637	57.2416	0.0103125	1.16557
4930527A07Rik	58.0326	54.6577	57.7236	50.8695	48.4359	48.2166	45.9108	47.2883	0.0133458	1.16556
Gpr142	67.268	57.7671	60.9333	60.7195	56.7454	54.5412	49.0853	51.3256	0.0163285	1.16528
Baalc	66.1757	55.5785	64.3412	62.7469	48.827	55.563	51.379	57.7942	0.0291168	1.16519
Gm16144	67.1442	61.8451	56.0391	57.3779	46.2601	56.2816	52.4944	53.0373	0.0404285	1.165
Stmn4	58.2052	59.524	58.6503	59.6595	44.6859	52.0864	54.4177	51.5023	0.0265726	1.16452
Rmst	57.6643	53.474	49.9781	56.6733	48.2645	48.846	42.7956	47.1747	0.0144847	1.16415
Sele	58.6404	60.2728	64.8799	62.6471	57.2238	51.9816	50.8002	51.7182	0.00485322	1.16397
Gm12100	43.41	45.4029	42.2088	39.7925	36.5168	38.1026	36.9044	35.2399	0.00800118	1.16387
Cndp1	63.9032	58.7167	56.8949	62.3209	48.4248	54.7556	54.2402	50.3729	0.00865284	1.16383
Kncn	85.9648	86.0445	74.6072	72.7185	66.4056	65.9175	73.9956	68.3167	0.0442009	1.16276
A230046K03Rik	580.301	545.937	593.375	565.278	422.093	526.555	494.571	521.932	0.0374557	1.16271
Gmcl1l	51.2733	48.0491	45.5063	53.3468	37.5773	46.4039	43.9476	42.5151	0.034458	1.1627
5730457N03Rik	54.555	56.5178	60.3137	49.3215	46.9097	45.6433	49.4883	47.7829	0.0368689	1.1627
Zfp658	70.0869	74.5127	68.7512	68.8178	57.0419	59.4948	64.2304	61.9393	0.0031864	1.16259
Nxnl2	53.7764	57.8671	56.8562	50.6018	45.151	44.3121	50.8406	48.1729	0.0137888	1.16249
4930583K01Rik	58.8488	71.6734	61.2336	62.1947	50.2786	52.0247	59.4374	56.7699	0.0485755	1.16219
4921507P07Rik	59.2228	59.8676	63.2665	60.8176	55.0177	45.5553	56.6986	52.0207	0.0343261	1.16189
Pacs1	459.894	482.248	464.86	429.681	393.539	411.499	376.263	399.709	0.00409637	1.16171
Cyp2a4	41.8133	49.8646	43.9743	41.8019	38.5609	38.0656	38.6035	37.5469	0.0465773	1.16152
Olfr834	35.4814	35.7154	35.9958	34.9548	30.3627	29.5942	29.1771	33.2477	0.0102618	1.16151
Sct	81.4489	84.7589	77.9823	74.4709	72.6895	63.6789	74.6632	63.3439	0.0266348	1.16141
Gm10584	58.6714	53.7287	56.5738	52.1704	44.8184	46.5376	51.9538	47.1226	0.0108469	1.16127
Znrf4	71.0686	63.3704	62.4157	63.7292	57.6536	58.3187	60.2944	48.1571	0.0393054	1.16112
Gm19263	60.3818	56.4253	56.7249	58.0926	51.8378	53.1409	50.2112	44.4843	0.0171247	1.16001
Camsap1	264.318	233.343	257.717	237.713	219.992	211.051	219.034	206.08	0.0132904	1.15994
9230102K24Rik	58.9416	57.5178	51.2155	48.7024	48.8767	48.4004	43.051	46.2662	0.0484693	1.15961
Nags	75.9603	66.4853	65.754	66.8795	53.6326	60.7583	56.8179	66.0272	0.0394395	1.15952
Ddb1	2053.39	2030.84	1889.91	1981.73	1511.19	1736.95	1766.9	1849.37	0.0239963	1.15901
4933417A18Rik	46.9851	53.5165	55.2833	53.9967	44.7337	49.3463	47.5616	39.4164	0.0465213	1.15864
Ferd3l	48.3349	51.323	51.7551	44.8004	43.9985	43.7413	40.3408	41.3122	0.016575	1.15833
Kdm5b	620.472	571.732	567.83	603.601	489.537	548.046	459.031	545.256	0.0255719	1.15758
Olfr1155	40.7936	38.5958	40.237	38.4305	37.1548	33.5286	33.7261	32.1545	0.00803258	1.15738
Vmn2r-ps54	36.1433	40.0229	36.2187	38.8335	33.4418	28.5798	36.6638	31.9766	0.047122	1.15733
9530048J24Rik	66.427	69.3574	66.6213	78.1423	58.972	65.299	58.0106	60.1503	0.0317656	1.15722
Gm19788	53.8411	54.3273	49.7874	55.8665	47.1302	46.9511	46.0035	44.7095	0.00648903	1.15708
Tfec	53.9934	46.0594	47.0146	52.9007	45.8031	40.6205	39.6919	46.7381	0.0460612	1.15686
Gm5237	85.4528	78.568	73.9216	79.5829	65.1567	69.4213	66.5718	73.3221	0.0125625	1.15686
1700003E24Rik	52.6455	46.5111	55.4903	54.4348	44.6134	42.7544	48.3384	45.0438	0.0297921	1.15675
5730403I07Rik	53.1233	50.9501	53.9953	54.9504	45.2129	48.467	49.4612	41.0308	0.0242066	1.15663
Car10	61.2752	56.0219	62.8801	59.2484	54.4693	56.6405	48.2509	47.6628	0.0281071	1.15651
Ctnnbip1	57.2484	52.432	54.2802	53.5965	44.2637	43.4004	46.919	53.5336	0.0409077	1.1565
Gm19618	53.657	46.5872	48.3402	54.803	40.5985	41.1186	46.4153	47.7435	0.0441678	1.15642
Slc39a12	49.1768	51.2471	49.8526	49.4797	40.2176	45.4189	40.1002	47.0233	0.0283794	1.15626
Clec1a	58.8881	57.3332	62.2458	64.1968	47.1543	54.673	49.1072	59.0076	0.0485414	1.15586
Gm13057	53.1351	55.9314	55.627	47.7304	43.8407	46.6704	49.5417	43.74	0.025233	1.15578
2810030E01Rik	59.3757	59.3174	57.0313	63.0374	56.7457	53.2016	46.5686	50.0683	0.025274	1.15576
Asap3	94.5667	96.4621	101.821	97.3989	83.4303	78.7643	82.8174	92.6615	0.0130013	1.1557
Psca	48.5545	49.2296	46.7225	41.328	42.7886	40.387	41.5237	36.1098	0.0363519	1.15562
Vmn2r82	39.3773	38.3498	42.1862	45.3742	33.9431	34.9403	33.7857	40.3846	0.0461606	1.15542
AI467606	57.4021	63.7266	56.201	57.3784	51.1794	49.615	50.511	51.8515	0.0154554	1.1553
Cplx4	51.8181	43.8712	49.7109	47.9168	39.8091	43.5797	37.9203	46.0234	0.0401681	1.15529
Xylt2	143.318	144.709	145.334	160.347	135.609	126.765	129.855	121.795	0.00826513	1.15502
Nrsn2	58.9386	67.4901	58.6725	60.4394	52.0294	53.8958	55.1172	51.5473	0.0215864	1.155
Vmn1r84	44.9851	41.9206	40.083	43.6181	33.235	41.5849	37.5597	35.3391	0.0410852	1.15494
Polr2b	1012.83	1056.03	1026.84	1044.57	815.229	944.877	913.958	910.845	0.011479	1.15492
2810404F17Rik	47.1635	43.949	45.2696	42.3042	38.4502	36.0921	37.7817	42.3946	0.0132977	1.15491
Bclaf1	957.538	970.502	1122.88	961.225	858.729	876.97	804.898	933.444	0.0362782	1.15489
Impg2	45.7394	47.9846	47.6863	49.3157	40.786	41.1398	41.2111	42.097	0.00151421	1.15428
Snd1	841.933	795.679	761.26	828.926	779.266	647.406	663.642	706.802	0.0265528	1.15397
Agrp	77.4561	64.7009	72.1192	67.7986	62.842	58.0384	63.4806	60.4197	0.0352802	1.15236
Eif4b	1733.98	1501.65	1734.32	1549.32	1344.06	1297.52	1564.53	1451.83	0.0449658	1.15223
Gm15910	64.8862	64.4016	64.9252	56.1091	54.4393	50.6421	60.9272	51.2866	0.0417483	1.15199
Gm2824	50.526	52.5994	48.4944	53.2104	42.3971	46.2426	48.2155	40.9711	0.0187877	1.15186
4930509K18Rik	44.852	46.4198	45.9778	49.734	40.3277	40.5742	41.8141	39.6197	0.0053639	1.15183
2810011L19Rik	61.0333	75.2447	69.8698	68.0487	61.822	56.1904	57.6948	62.3554	0.0459649	1.15178
Ccdc113	55.6234	56.9367	51.4248	47.8637	43.3988	46.6849	49.2371	44.6509	0.0350269	1.15153
Gpr4	84.1462	78.8298	89.7209	85.6343	71.6106	76.5153	71.7444	73.9492	0.00908048	1.15149
Gm14718	42.0924	41.4227	39.3707	41.0258	34.7563	38.5273	34.5939	34.4732	0.00558295	1.15146
Lin28a	75.9094	68.7938	72.003	68.6182	59.1973	66.7243	66.7606	55.1225	0.0393663	1.15141
Abcb6	210.841	215.928	211.883	211.618	179.871	172.733	192.721	193.354	0.00969285	1.15107
C1qtnf5	86.7621	83.5706	82.5599	80.5823	71.4301	64.8901	82.2301	71.2191	0.0495003	1.15083
Usp46	50.3067	44.1304	48.1233	47.1752	41.7031	38.401	40.5602	44.247	0.0127056	1.15053
Adad2	46.737	49.3758	51.4519	52.4583	39.3052	44.5329	47.4661	42.608	0.0245179	1.15014
Sp5	65.3428	63.3886	61.4485	55.6437	49.5463	50.8084	57.3352	56.0629	0.0304682	1.15004
2210012G02Rik	50.3256	52.9114	52.5398	46.2183	44.4063	39.2809	45.7201	46.2834	0.0250757	1.14972
Slc37a3	589.639	524.795	486.827	528.705	430.093	489.268	490.149	444.098	0.0426683	1.14909
Rock2	1042.76	958.758	980.267	1009.35	839.394	991.742	813.604	831.883	0.0445065	1.14799
4930567H12Rik	81.9456	94.1018	97.2724	89.7368	74.8976	82.8214	77.9592	80.6661	0.0301776	1.14766
Kdm5a	342.016	299.562	332.462	286.158	264.523	271.138	271.866	290.593	0.0473925	1.1476
Gm17783	47.6022	48.5917	46.9299	46.0109	45.7912	37.9468	42.2431	38.8329	0.0371612	1.14756
Gm9920	54.8363	56.1693	51.6466	50.5903	45.8389	49.8964	43.8671	46.2514	0.00934448	1.14737
Abca14	45.3492	42.8533	50.972	47.5038	40.2153	38.3047	44.3346	39.9399	0.0346687	1.14671
Sppl3	587.898	552.934	631.282	624.12	460.157	541.854	522.773	564.879	0.0392796	1.14671
Defb3	46.9567	47.3759	52.3884	47.6481	42.6236	43.9539	40.1509	42.7959	0.00889526	1.14656
Slc5a5	70.9416	71.9306	62.3539	67.1282	62.701	55.4446	57.848	61.6183	0.0212363	1.14621
Nkg7	63.2938	67.1686	65.6309	65.1552	54.4709	61.3702	54.5762	57.537	0.00812794	1.14606
1700101O22Rik	49.4083	49.5508	54.4006	56.0413	45.1721	47.4819	46.182	43.8954	0.0213252	1.14595
Gm2447	48.9681	45.3382	46.9744	53.8002	40.5258	44.7002	43.1517	41.9216	0.0345531	1.14552
Ahcyl1	1495	1678.3	1486.41	1417.34	1273.55	1362.61	1322.1	1349.73	0.0346372	1.14489
Vmn1r18	44.1199	41.1639	38.8439	38.4542	31.4389	37.2643	35.0733	38.24	0.0426053	1.14481
Tmem200a	78.8232	69.5832	68.4471	67.5763	64.0147	57.9075	61.4063	65.1361	0.0323667	1.14475
D530049I02Rik	59.4164	63.697	53.4246	58.2635	49.9971	48.8416	56.0711	50.2147	0.0340227	1.14468
4933407H18Rik	82.9292	73.8598	75.7665	85.2701	67.7064	63.7815	70.1419	76.0508	0.0373738	1.14457
Plekhb2	437.47	448.327	464.291	396.559	356.824	375.652	396.859	396.758	0.0232417	1.14452
Gm5218	51.4463	48.1908	54.5851	52.332	49.0875	46.3372	42.6332	42.4713	0.0209455	1.14416
Gpr87	40.5369	40.2426	35.2299	41.9692	33.5877	36.2026	31.3866	36.8979	0.043431	1.14415
D17Wsu92e	633.525	624.693	648.374	598.477	581.056	505.606	546.505	556.381	0.00787496	1.1441
Aurkc	76.9259	65.846	76.1954	68.4429	60.9813	66.4855	66.0932	57.6722	0.0437887	1.144
Vmn2r86	34.9291	35.8887	37.0895	38.0557	32.0441	30.16	33.9534	31.4671	0.00481589	1.14369
Csn1s2b	39.8095	42.1593	37.3054	42.891	33.9568	39.8625	33.5708	34.478	0.0409554	1.14307
Olfr1410	44.1366	48.6351	41.197	42.2884	41.0946	35.6443	36.9095	40.5667	0.0421646	1.14293
Slc35e4	79.825	89.3856	84.0242	83.2269	76.555	77.299	65.8556	74.6884	0.0209569	1.14288
Limk2	91.2785	95.4851	86.4581	91.0183	85.8437	73.8408	75.2527	83.8372	0.0237352	1.14263
Cdh23	52.9909	52.1449	52.822	45.3233	43.5499	40.3999	48.3089	45.653	0.0438493	1.1426
Lrrc10	68.6448	60.795	59.2753	57.5707	54.2135	56.1204	54.7772	50.4616	0.043447	1.14247
Gm8884	58.1866	59.8094	56.3999	51.3491	48.0626	48.1633	52.9426	48.4266	0.0224845	1.14246
Mtap7d3	48.3724	43.9817	48.3604	44.3606	37.9203	41.7752	38.6539	43.6696	0.019336	1.14231
Otop3	49.2392	54.0235	57.1598	53.0696	43.573	49.3069	45.2684	48.826	0.0219782	1.14183
Usp47	1078.39	1058.88	1092.99	1057.42	906.307	982.792	944.505	924.373	0.00126431	1.14095
Epor	67.3062	69.8486	78.3866	78.9235	65.6373	68.5723	64.2565	59.6657	0.0477241	1.14075
Adamtsl2	92.1292	81.4228	80.2887	78.6026	74.9186	69.6314	69.616	77.3163	0.0362501	1.14053
Fam71b	59.1348	62.7204	57.3339	59.0817	51.5375	47.5445	57.5203	52.4699	0.0288859	1.13966
Fam70b	67.0757	69.2875	64.8759	65.9811	60.3051	54.7237	60.3651	59.0827	0.00325329	1.13965
Gm3159	44.69	43.5472	40.1739	42.7997	35.4463	38.9782	37.0386	38.7694	0.00635027	1.13964
Col9a1	71.1758	61.6731	64.2035	71.8094	61.9997	52.8647	60.9045	60.2014	0.0470668	1.13939
Olfr1049	36.8248	38.4299	39.2881	41.4837	34.2638	34.5848	33.4953	34.6286	0.0130511	1.13911
Lrrc47	195.472	195.937	218.369	195.748	184.408	178.854	182.339	161.652	0.0187889	1.13895
Slc19a1	83.1108	92.1349	82.9305	80.2207	78.6602	70.2398	69.8589	78.3692	0.0277386	1.13889
Olfr456	36.7808	41.6657	41.0083	38.4112	37.0235	33.3854	34.8043	33.4215	0.0167006	1.13872
Olfr314	45.888	49.1266	52.0714	48.1009	39.2594	41.7331	47.3665	43.0906	0.0341783	1.13845
Lmx1a	56.5391	58.7836	52.9936	53.9146	46.7209	46.7174	49.0806	52.6902	0.012821	1.13842
BC051070	51.8102	57.1491	50.2796	49.3847	43.0277	48.2563	44.4882	47.576	0.0286113	1.13785
Nfs1	227.589	229.769	213.546	212.777	188.66	208.566	197.566	181.987	0.0117281	1.13762
Pea15b	48.356	41.4395	48.0376	45.582	39.2616	42.6518	38.3634	40.9591	0.031513	1.13756
Ppp2r1b	278.656	273.006	278.509	268.294	226.278	237.082	251.03	251.32	0.00715897	1.13747
Gm19663	51.4646	48.5506	54.334	46.2423	42.2564	44.649	41.334	48.1884	0.0417591	1.13696
Gjd2	66.0481	59.247	57.3671	55.1588	48.66	50.8753	54.2666	55.3828	0.0499191	1.13689
Hivep1	264.109	241.442	241.009	254.923	228.62	229.325	223.099	200.646	0.014931	1.13587
Hunk	162.362	162.162	161.564	169.309	129.69	146.313	140.83	160.313	0.0494956	1.13558
D830005E20Rik	46.4962	46.227	41.7284	45.3655	36.7562	41.508	40.2389	39.8898	0.0117326	1.13526
Plac8l1	45.3784	42.1113	42.0245	41.6393	38.1131	37.5721	36.1027	38.9957	0.00404693	1.13509
Gm10408	54.2556	58.254	54.3763	62.761	46.8761	53.2752	53.7732	48.4319	0.042954	1.13486
Zic3	40.5998	45.0298	46.5273	46.021	42.2465	41.2151	34.7954	38.7974	0.0499747	1.1345
Lim2	51.3668	56.2238	55.9643	62.1123	48.8229	47.0624	52.4726	50.5815	0.0480576	1.13435
Tulp2	65.3747	57.1923	56.1252	57.399	52.1361	53.0114	47.1412	55.8675	0.0481224	1.1342
Rundc1	263.072	251.453	282.928	257.34	231.237	217.572	248.609	232.608	0.0156745	1.13415
Cfi	51.6569	49.8631	47.8458	51.1817	44.4201	42.7165	44.5404	45.1708	0.00198074	1.13401
Gm15114	42.6171	39.6057	36.7943	39.4982	34.5211	35.9697	32.88	36.4413	0.0208799	1.13377
Wnt16	48.7392	49.8042	49.8002	48.1034	45.1966	42.6018	43.9814	41.4914	0.0020529	1.13375
Irf9	286.059	275.019	298.212	282.651	243.685	225.336	264.756	273.453	0.0447064	1.13374
Dffb	64.0299	66.9052	66.9682	69.2715	54.1976	62.0047	59.5424	60.0367	0.0103141	1.13315
Ddr1	284.313	274.268	245.342	263.703	225.343	222.599	259.805	234.592	0.0387316	1.13295
Gm14204	52.5271	54.4538	45.7305	51.9361	43.5136	43.7789	47.2317	46.1812	0.0421506	1.13249
E230025N22Rik	68.6623	71.6256	65.4662	64.8156	64.5914	52.6966	61.4695	60.3543	0.045549	1.13156
Cyp3a59	46.0752	40.7729	41.3081	42.3437	38.3738	36.5386	37.5105	38.3065	0.019857	1.13117
Ins1	57.3929	52.0985	50.7413	54.4096	46.0634	45.4265	46.4487	51.8275	0.0240743	1.13109
Aaas	289.996	254.774	290.485	263.192	250.676	239.994	258.105	222.376	0.0391822	1.13108
Trip12	1459.13	1371.3	1503.4	1455.83	1286.4	1370.41	1152	1311.78	0.0273324	1.13066
Ubr3	851.728	880.129	883.31	891.494	840.574	775.164	694.04	792.936	0.0406369	1.13019
Emx2os	58.0803	53.4271	53.8338	51.4668	46.9134	47.0829	46.1188	51.8175	0.0171538	1.1296
Olfr1264	43.4065	50.2413	45.8915	47.916	40.619	40.2618	45.2645	39.8672	0.0325827	1.12916
LOC100861673	47.005	45.0224	42.7351	46.5135	38.4708	40.9307	42.7803	38.3816	0.0112438	1.129
Opalin	46.8998	41.553	44.2407	43.4512	39.1019	37.6662	39.9074	39.3452	0.013522	1.12898
Igsf6	132.138	125.821	129.764	147.263	113.021	117.663	119.696	123.516	0.0389311	1.12891
Atf6	779.961	774.763	680.18	704.091	660.883	630.851	646.823	667.98	0.0395185	1.12755
Ldlrap1	476.305	509.635	504.195	454.982	424.506	397.102	470.248	433.701	0.0330362	1.12724
Lemd1	54.1747	51.2174	50.3808	45.6079	43.097	46.9488	47.1588	41.4529	0.0485881	1.12719
Akr1d1	50.5819	50.878	44.7401	44.8954	38.9366	42.5982	45.1538	42.8538	0.0482422	1.12712
Alkbh5	720.895	686.88	721.477	646.848	583.492	599.132	620.74	660.022	0.0181382	1.12694
Mir3473	38.001	38.2994	36.7265	34.0769	30.4944	33.6825	34.6598	31.6976	0.0217948	1.12694
Olfr67	38.3653	41.0405	40.7923	40.4193	35.5149	36.2076	36.7749	34.155	0.00169066	1.12594
2200002J24Rik	44.1197	51.3106	51.2541	48.75	44.5586	42.6991	40.8753	45.4704	0.0401247	1.12575
Gm9573	60.7561	55.5077	51.8247	53.2084	49.4764	52.7755	45.6282	48.6976	0.0483662	1.12575
Fam168a	504.541	532.762	583.611	521.936	501.056	452.127	478.018	472.311	0.0300489	1.12573
Krtap1-5	39.5495	43.5969	39.6727	39.8435	34.7984	34.664	37.0263	38.0167	0.012833	1.12565
Prss58	46.9544	47.3863	46.0969	41.9187	41.6419	36.6758	41.7466	41.942	0.0294039	1.12561
Vmn2r49	38.087	39.6366	35.9522	40.4236	33.609	33.8209	35.7249	33.7936	0.0145876	1.12524
Ptchd2	72.7975	69.3019	63.6112	67.0533	62.9945	61.2076	59.8678	58.3485	0.0208007	1.12518
2310004I24Rik	102.036	109.451	101.525	98.1743	91.8271	94.1009	89.141	90.4342	0.0108896	1.12499
Zc3h12b	106.186	107.411	108.754	105.12	91.372	93.0889	94.0075	101.541	0.00912418	1.1249
1700047F07Rik	51.5831	52.792	46.424	49.0794	44.6077	41.0448	45.7182	46.3218	0.0245252	1.12486
LOC100862032	40.4693	43.5773	43.1219	41.3954	39.0996	34.5107	39.5336	36.7305	0.0188905	1.1247
Taar8b	35.9742	31.8067	35.5279	36.5403	30.5986	31.9344	31.3724	30.4728	0.0310378	1.12439
LOC100125594	41.166	40.5059	41.5888	37.1021	32.9139	35.5979	37.7124	36.4304	0.0217726	1.12413
4930589P08Rik	53.5669	55.4272	53.3127	50.2946	49.8322	45.9445	48.8859	44.4783	0.0122028	1.12404
Cebpd	71.9038	75.9758	71.0154	73.97	69.859	64.027	62.8528	63.809	0.00762226	1.12404
Mboat4	53.7269	57.3849	55.8979	52.5973	48.6746	50.8846	45.5718	50.2689	0.00936712	1.12388
4930486F22Rik	45.0643	48.6145	41.2138	44.5572	41.6209	40.4869	41.4952	36.1673	0.0489992	1.12317
Olfr1156	38.8831	42.2537	41.7196	37.5987	35.2302	35.4163	35.4298	36.8137	0.0239767	1.12293
9030622O22Rik	60.4695	54.3906	64.7636	59.9404	53.6694	49.5747	56.6376	53.5554	0.0494775	1.12241
Pdzd7	64.9273	63.5256	71.1289	62.861	62.2748	52.6258	59.2137	59.7098	0.0430339	1.12239
Slc13a1	44.74	45.0641	46.1832	45.826	38.6658	42.2928	42.5062	38.547	0.0160902	1.12222
Vmn2r67	38.6843	35.7425	36.482	35.3448	34.3984	32.3962	31.2873	32.2612	0.00724992	1.12207
Prl8a1	45.9553	41.2582	42.9479	44.2795	39.0584	37.0784	37.6401	41.7154	0.0165039	1.12186
Scnn1g	62.7554	68.4727	63.63	62.5012	55.3607	59.9857	56.2104	58.0174	0.00845488	1.12103
Foxq1	46.5817	44.814	48.0501	44.6394	38.575	40.2105	42.4036	43.1081	0.0103954	1.12044
Gm10058	41.2962	43.1535	37.6172	42.8703	35.2578	37.8409	38.4867	35.6469	0.0317043	1.12025
Gm6976	45.883	44.4109	47.2873	45.6775	37.2038	41.8344	40.3721	44.1913	0.0362234	1.12015
Lgals12	54.0709	58.9409	54.2788	54.2403	53.2108	47.7298	48.0285	48.8777	0.0145745	1.11971
Ptpn5	70.1101	65.8324	61.8447	69.2951	57.1779	63.7757	58.5498	59.0736	0.0258705	1.11948
Il11ra2	152.168	165.532	164.788	148.938	146.855	147.775	136.705	132.714	0.0255101	1.11945
Gm19859	47.6193	47.9415	43.203	43.9306	42.9825	41.8754	40.8915	37.4579	0.0293684	1.1194
Cep120	317.254	294.041	321.703	306.257	269.562	270.511	276.76	290.256	0.00629958	1.11938
Zbtb32	67.0217	65.3545	68.1087	63.771	57.7274	62.6511	54.3105	61.4634	0.0253439	1.11901
4933407C03Rik	671.318	688.649	765.88	724.77	657.103	668.483	601.071	621.311	0.0300882	1.11878
Gm3591	52.9473	52.2155	48.1696	52.2397	50.7112	45.8909	43.4972	43.6651	0.0404663	1.11867
Tmc8	65.6864	63.6217	67.7732	66.0054	59.7659	62.303	56.0764	57.0411	0.00836056	1.11863
1700008F21Rik	37.9393	41.8795	36.1838	37.2388	34.1144	33.8654	32.2473	36.8295	0.04404	1.11809
Gm14022	56.5552	60.2394	60.9603	58.0117	52.7252	50.2038	55.5302	52.4194	0.00591139	1.11802
4933406F09Rik	40.655	38.1029	43.0608	43.0184	36.3419	34.6665	37.9167	38.6237	0.0284846	1.11717
Them5	54.6799	52.2263	50.3697	54.6828	47.7703	51.6446	45.8228	44.5145	0.0295207	1.11703
Liph	48.1287	43.8991	47.4946	51.6418	42.9124	44.2982	40.3243	43.6728	0.0431274	1.11656
Figla	53.4757	53.7669	56.1218	51.7632	47.8935	47.8688	50.549	46.3893	0.00412311	1.11638
Trim6	43.0077	48.0583	44.7952	46.2232	41.6715	39.7039	39.5706	42.2303	0.0132533	1.11588
4930405D11Rik	39.8045	36.575	42.4256	37.7717	36.4154	36.9209	32.8277	34.1579	0.0472666	1.11584
Gpr83	51.2473	50.5163	47.3248	49.2034	39.9942	46.619	45.8637	45.2715	0.0333878	1.11558
Cand1	510.211	566.782	546.581	590.555	493.958	485.145	513.458	492.487	0.0370049	1.1154
Slco1b2	39.0956	40.7054	43.0597	40.0532	33.6179	35.7037	36.8253	39.9572	0.043084	1.11505
Rell1	781.22	748.917	724.526	688.668	623.331	688.937	667.249	661.247	0.0224375	1.11458
Gm11793	60.9507	62.8874	56.1875	57.7093	49.7456	55.0696	54.3862	54.1847	0.0217172	1.11411
Tex261	728.699	780.601	759.821	715.893	623.779	631.565	714.062	710.225	0.0447666	1.11396
Gm17677	38.4773	40.7109	37.7179	35.3481	33.0136	35.4277	33.3429	34.9124	0.030091	1.11381
Tnfrsf17	49.8033	49.9999	52.3514	45.7462	42.4799	42.3346	47.5294	45.3757	0.0349001	1.11356
Gsg1	54.5107	53.7392	51.5345	51.9438	50.154	48.0634	42.8867	49.0657	0.0360177	1.11336
Olfr807	38.5623	38.8494	40.2296	40.2546	31.7701	36.5619	36.7627	36.7326	0.0401967	1.1133
2310068J16Rik	55.534	59.6499	57.9869	57.693	54.9307	51.6224	50.7092	50.1995	0.00566447	1.1128
Zp1	51.9255	57.5361	56.0363	56.5147	46.027	51.3105	49.7292	52.4552	0.0240764	1.11272
1700030F18Rik	46.0497	41.9153	44.661	43.4487	40.0264	42.4467	36.8325	38.9323	0.0247556	1.11272
Gm19424	54.54	48.3599	54.7865	51.8802	44.8897	45.4504	50.5549	47.4428	0.0366491	1.11272
Itgb2l	52.364	47.4702	49.2446	49.7506	41.6344	45.7618	46.4414	44.8722	0.0140946	1.11258
Sdc1	65.5319	60.6681	65.4784	67.6367	52.7564	59.837	58.4801	62.2	0.0432388	1.11164
Marveld2	60.7922	56.2313	52.6953	54.199	50.8486	48.4136	51.6881	50.524	0.0424968	1.1114
Gpr111	62.906	57.1365	64.9895	57.9558	55.4592	54.5368	54.3286	54.3263	0.0480245	1.11131
Olfr140	44.0372	45.4854	45.1127	43.939	40.7932	38.6249	40.8268	40.5212	0.000702171	1.11077
Capza3	47.84	43.6287	43.4446	44.4373	36.5666	40.3841	42.2991	42.2776	0.0416414	1.11034
Zcchc6	483.149	476.083	518.463	453.709	413.87	455.691	437.426	432.782	0.0291426	1.11015
Mecom	49.2507	45.6579	45.2804	47.5906	45.2989	42.1795	41.5471	40.1393	0.0178721	1.11004
Nme9	45.7072	47.0621	49.7783	47.9635	40.3231	43.3137	45.268	42.7862	0.0128118	1.10962
Fermt1	43.3396	46.5223	47.2842	42.5229	40.2609	41.7857	39.3871	40.5477	0.0248421	1.1092
Rpl10l	39.857	40.3617	41.644	42.6142	37.247	38.3552	36.0939	36.5972	0.00261039	1.10913
B020031M17Rik	41.6373	42.2772	44.5971	38.7903	39.4308	35.9452	38.5669	36.9333	0.0334976	1.10887
Dera	299.653	292.277	293.776	282.583	242.672	282.625	273.219	255.249	0.0421129	1.10868
Cypt1	66.1418	68.7105	59.7341	62.9609	61.7887	56.3786	58.66	55.5042	0.0428946	1.10853
Catsper3	50.506	52.0214	49.8725	49.4969	48.6038	43.0021	48.0186	42.5408	0.0482549	1.10832
Pkm	6427.18	6240	6650.71	6409.04	5552.48	5455.19	6192.99	6015.27	0.030355	1.10816
Gm7972	47.4654	52.4297	50.4693	50.7484	43.4911	48.143	42.8776	46.9798	0.0265531	1.10811
Jund	127.79	131.152	122.439	120.83	111.036	122.111	113.846	106.241	0.0274207	1.10806
Pabpc1	65.8335	73.2408	72.1061	71.5732	61.5748	60.9204	67.2511	65.4702	0.0224713	1.1079
Olfr1198	42.5462	39.9148	40.651	37.9626	36.3057	37.4919	35.7675	35.8469	0.0187237	1.10771
Olfr775	36.0754	39.9383	34.4104	36.8154	32.8636	34.5842	34.179	31.3301	0.0472955	1.10742
Armc4	48.2077	46.7955	49.5554	47.046	43.6395	44.4258	42.2881	42.6689	0.00139686	1.1074
LOC100040196	45.9234	44.3453	42.0744	47.7306	40.6235	39.9688	43.0859	38.9889	0.0292038	1.10701
Gkn1	75.643	77.3567	70.3662	74.2548	66.7498	66.5875	66.392	69.7248	0.0105254	1.10453
1110059M19Rik	41.22	43.6985	39.6531	38.5077	35.3777	36.7562	37.8998	37.6149	0.0326814	1.10451
Tmem190	44.3151	44.4694	42.2066	47.0822	39.4281	42.7891	38.7412	40.278	0.0200537	1.10442
Gm20408	43.5638	43.1308	39.3687	42.7351	38.3449	40.3836	37.1322	37.0233	0.0192329	1.1041
Gm9946	62.4093	63.6874	58.9681	58.2223	53.1942	55.3087	54.8757	57.0002	0.0141921	1.10395
4930592A05Rik	40.2637	39.688	39.2735	37.6907	33.0989	37.5159	36.1709	35.3834	0.0194826	1.10373
Adamts19	62.3017	64.1607	58.5271	55.9174	53.8077	54.8311	53.4434	56.2384	0.0495339	1.10345
Olfr446	53.6566	49.817	49.6978	52.0926	44.2791	49.4274	48.439	43.8911	0.0353164	1.10335
Vmn1r63	50.0857	50.3133	49.1056	48.2306	46.5718	45.9486	42.5906	44.1595	0.00778213	1.103
Olfr1295	34.9434	38.7222	38.5593	36.5137	34.8135	34.9712	33.6038	31.5114	0.028703	1.10259
Pi15	48.5445	42.9004	44.2893	44.4345	40.8054	40.279	39.1907	43.1663	0.0342494	1.10234
Gm19784	57.8393	59.0862	57.684	60.698	53.3212	57.6924	53.512	49.2061	0.0453693	1.10095
LOC664924	65.1589	59.8897	58.5486	60.0969	58.6164	52.7197	53.955	56.3853	0.0309498	1.09932
Sepsecs	235.271	229.062	223.813	222.547	196.014	198.602	225.398	208.758	0.0465977	1.09885
Serpinb3b	30.4689	32.2214	32.5584	30.384	30.2645	27.8001	29.0647	27.2701	0.019538	1.09819
Vmn1r8	32.0993	31.0284	34.0917	33.6526	30.3138	29.8917	29.4445	29.5447	0.0217193	1.09797
Gm4916	37.5699	34.3921	38.7572	36.4863	32.2205	35.5391	33.4359	32.9131	0.0335114	1.09766
Olfr1204	40.7738	36.6782	39.6641	38.2886	34.9435	35.8057	35.0531	35.7943	0.0260064	1.09752
Gm13815	75.5854	73.8919	74.6358	73.8419	68.7447	67.7541	68.0655	66.9605	2.18113e-05	1.09734
5930412G12Rik	55.3539	57.3186	54.4674	51.0081	52.3268	47.0428	48.4907	51.072	0.0361813	1.09659
Tnfsf15	57.6718	55.3324	60.916	59.8091	52.4764	53.8456	55.6997	51.1916	0.0183617	1.09622
Tnfrsf18	93.5244	104.71	97.8577	102.425	92.9662	87.2207	89.7338	93.9552	0.0313305	1.0952
Klrc3	33.0158	32.0021	31.2689	33.5923	28.3477	29.0607	32.3517	28.8445	0.0458253	1.09506
Sap18	80.8636	81.8284	77.5126	77.0618	66.5641	75.7484	72.0493	75.6685	0.0429176	1.09391
Sik2	332.493	350.91	338.687	338.562	305.75	301.008	335.18	302.189	0.0285267	1.09366
4930511M06Rik	46.9085	46.3687	48.8813	42.7216	41.5864	43.1594	41.9709	42.334	0.0499198	1.09364
Vmn2r104	41.7592	37.8623	37.245	37.3286	35.6575	34.8069	36.3483	34.1931	0.047344	1.09354
Olfr824	41.6461	45.1024	43.7931	41.2101	41.0718	36.3748	40.7726	38.9459	0.0430345	1.09281
4930441J16Rik	41.6064	39.265	40.7159	40.259	37.3083	35.5518	39.8761	35.3663	0.0379122	1.0928
Mir380	37.664	41.0587	37.9848	39.8645	34.4143	34.9463	36.3652	37.5827	0.0218828	1.09255
Hoxb6	49.7437	53.8469	50.8726	47.2631	47.5456	47.7695	44.6138	45.0443	0.0473765	1.09057
LOC100862265	39.8527	38.8146	42.6363	41.895	37.5707	36.4076	38.4886	37.2329	0.0233575	1.09017
Strc	55.4236	51.6586	51.7019	50.6244	46.3171	50.7383	46.0516	48.9947	0.03086	1.09009
Tpp2	536.978	560.851	557.141	546.057	476.697	531.322	518.846	493.903	0.0270253	1.0892
Astx	44.158	44.2399	44.1412	45.3401	39.7564	41.5849	39.2259	42.756	0.0157179	1.08912
6430704M03Rik	50.9428	46.0106	46.736	49.749	43.7183	42.9812	46.1193	44.9703	0.03688	1.08802
Cxxc4	50.734	49.0337	47.2727	49.3053	47.0245	43.9033	44.6157	45.0396	0.00685894	1.08729
Olfr348	38.4136	37.557	39.6697	37.7892	33.418	35.8843	37.8102	34.0925	0.0449575	1.08657
Nefh	67.9766	62.3029	69.2411	64.533	63.8374	61.4297	59.6032	58.232	0.0420293	1.08618
Apcs	46.8359	43.8068	46.9683	43.2179	43.5865	40.4602	39.7216	42.7183	0.0373987	1.08615
Gm10237	49.0375	47.8451	47.2519	50.0438	46.4194	46.808	41.5501	44.0238	0.0425051	1.086
Gpr82	40.3767	40.9678	42.6244	38.7246	36.4729	38.6057	39.1619	35.5817	0.0336219	1.08591
Pcbp2	3896.13	3586.84	3923.91	3889.74	3512.92	3472.9	3658.59	3454.99	0.0237599	1.08491
Pgk1	5828.47	5617.88	5607.41	5225.02	4880.28	5106.74	5222.76	5327.42	0.0355106	1.0848
4931409K22Rik	50.1055	54.363	54.3989	54.2268	50.2078	48.0073	47.9181	50.4218	0.0209497	1.08415
Usp7	557.755	550.159	571.607	574.367	498.767	517.778	511.553	551.743	0.0224065	1.08368
Lin28b	45.2358	46.2101	48.3322	46.9347	43.8259	44.4305	41.1995	42.9436	0.00981946	1.08302
Ccdc66	242.113	241.556	228.393	235.637	205.673	223.983	219.76	225.668	0.0199188	1.08298
1700010B08Rik	53.8473	58.8804	54.1296	55.462	53.4734	51.5725	49.2505	51.0288	0.0283617	1.08277
BC039771	54.672	55.1949	50.251	54.7049	50.9562	46.6589	50.8668	50.0317	0.0385759	1.08216
Vmn1r64	31.9157	32.2859	31.8917	31.3239	28.9108	29.442	28.7459	30.8804	0.0109571	1.08
Tas2r120	38.584	41.7018	41.0739	38.522	35.8756	35.7623	37.9008	38.6304	0.0379779	1.07905
1700066B17Rik	40.4442	41.1174	43.0235	41.4968	39.2417	40.711	37.633	36.4339	0.0399536	1.07832
Reg3g	44.7177	44.4911	43.2054	42.9874	42.2337	39.7937	40.6878	40.0194	0.00464099	1.07784
Gm13605	50.5964	48.7684	52.4422	50.6513	48.5518	47.3909	46.2118	45.7266	0.0104335	1.07759
Csn1s2a	46.574	43.8943	45.6062	42.7022	39.8786	43.7373	40.3792	41.9156	0.0393899	1.07755
Slco4a1	60.5111	60.1089	60.8403	63.4553	58.466	56.0295	53.6265	59.2975	0.0332682	1.07693
Gpr107	295.209	313.421	317.918	313.417	277.453	276.212	293.068	305.323	0.0462342	1.07631
Phyhipl	31.0232	32.9865	31.7309	34.0003	31.1166	29.8249	29.9681	29.7291	0.0325395	1.07545
Nedd4l	2711.23	2908.77	2680.86	2830.8	2554.55	2645.38	2532.16	2624.94	0.0265748	1.0748
Olfr906	37.2286	36.1149	37.2341	36.1244	35.1163	32.8838	35.8766	32.7653	0.0419965	1.07362
Grin1	69.3959	66.0383	67.4574	64.0803	60.3085	63.6325	62.4223	62.4297	0.0183827	1.07307
Blnk	61.7593	67.5854	65.8473	66.3838	58.3165	59.877	62.944	62.8349	0.0419452	1.07215
Faim3	55.5866	55.9019	56.2235	53.7703	52.2061	51.5884	52.8668	49.9222	0.00451843	1.07212
Ccdc37	46.728	45.3844	44.4602	44.6886	42.2125	41.8395	40.9681	44.1104	0.0122983	1.07172
Ppp3cc	234.593	230.034	228.97	222.741	199.802	219.692	221.707	214.466	0.0465199	1.0709
Smad4	1004.59	930.634	980.599	977.836	915.998	891.5	903.776	925.803	0.0176052	1.07055
Dhx15	957.61	936.358	1005.26	980.762	882.98	930.751	916.306	897.472	0.0157219	1.0696
Olfr1510	32.1288	32.3548	29.693	31.3741	28.3627	29.0276	29.178	30.8544	0.0451832	1.06922
Gm16294	51.9994	48.9688	51.2309	49.8851	48.3149	48.0905	46.6227	45.9837	0.0106203	1.06916
Samt4	36.4625	35.5813	35.9192	35.0692	32.3516	33.5237	33.5899	34.5266	0.0075429	1.06747
Tmco5	43.8621	42.6544	46.0566	44.2518	40.6911	40.6907	40.9985	43.4027	0.0286846	1.0666
Chdh	58.9075	59.3707	56.2828	54.6463	54.2747	54.7248	53.0802	52.927	0.0427373	1.06605
Duox2	54.3719	50.2321	53.6182	50.9182	48.129	49.1616	50.2583	49.3799	0.048789	1.06201
Fam122c	36.8276	34.3662	36.3118	35.4959	34.6166	34.3095	33.755	32.3035	0.0356515	1.05939
Tmeff1	32.6097	34.6443	34.4947	32.8799	33.101	30.848	32.0712	31.1891	0.0444637	1.05832
Rnf145	377.688	391.121	383.858	404.602	368.696	358.305	374.686	370.81	0.0263147	1.05757
Pramef8	188.52	184.432	185.016	183.172	180.308	166.647	178.184	177.812	0.0464753	1.05433
Apool	283.867	278.631	270.861	281.473	267.085	269.611	271.171	271.077	0.0441928	1.03326
Gm7616	53.8954	55.376	53.6965	53.7298	55.1753	56.7126	55.9927	54.8749	0.0396994	0.972805
Hexb	1259.47	1220.58	1245.32	1202.14	1254.76	1358.35	1286.95	1305.5	0.0410112	0.946589
0610031O16Rik	39.3833	37.4429	37.9214	38.5872	41.7627	40.692	41.2723	38.7919	0.0303772	0.943489
Olfr190	31.7208	30.8921	29.3272	29.3007	32.3212	33.4219	32.4405	30.9687	0.0461378	0.938743
Cyth2	485.273	455.706	483.659	459.051	486.115	506.657	515.9	500.998	0.0214829	0.937313
Gtpbp5	104.134	97.5682	99.9033	98.119	108.567	101.549	107.963	108.716	0.025522	0.93657
Dnahc8	48.8978	48.9933	48.3411	45.8789	50.519	52.4504	52.2609	50.1541	0.0132064	0.935372
Fgfr4	55.548	58.153	56.1266	53.2065	57.9522	57.9648	60.0313	62.5356	0.0411887	0.935216
Ttll8	53.0355	53.731	55.4497	51.7256	57.2101	58.9529	55.5893	57.4742	0.0105463	0.93332
4930419G24Rik	39.1267	36.6658	36.1042	39.3932	40.215	40.8951	40.8548	40.2531	0.0441339	0.932633
Oaz1-ps	4696.49	4655.09	4627.29	4993.37	4935.37	5306.29	5163.95	4951.18	0.0306317	0.931986
4932702P03Rik	49.5528	46.0376	48.0558	46.7855	51.5332	50.4792	51.1219	51.4758	0.0149976	0.930705
6430550D23Rik	63.101	61.4304	60.5734	58.4209	66.9069	68.6425	63.7697	62.4546	0.0426082	0.930291
Rnaset2a	2855.29	3165.52	3068.33	3084.14	3170.57	3386.9	3269.06	3266.27	0.0325205	0.929769
Dct	11124.9	12563.1	12175.3	12091.7	12658.8	12621.5	13108.1	13247.5	0.049203	0.928715
Rnaset2b	2845.48	3149.15	3063.33	3078.67	3166.37	3380.74	3262.22	3263.17	0.0296405	0.928411
LOC100043315	45.7102	44.9494	42.1856	42.1856	46.0768	48.6972	48.1069	45.7075	0.0298833	0.928111
Wdtc1	210.752	205.347	217.685	221.2	241.73	221.05	225.745	233.453	0.0287939	0.927336
Mir490	35.7276	34.2426	36.3411	33.9923	35.9129	37.7919	39.2946	38.5326	0.0242681	0.925902
E130303B06Rik	104.479	108.269	98.7937	106.375	111.032	118.069	116.01	107.519	0.0337767	0.92331
Dnajc3	1036.97	1080.48	1111.65	1169.66	1210.75	1137.64	1199.74	1219.58	0.0383807	0.922619
Colec10	41.5837	40.9787	44.1916	42.3866	45.5731	47.4894	42.9669	47.4182	0.0358772	0.922011
Acer1	40.3402	37.5735	41.3493	37.6467	41.8025	42.5158	44.0654	41.9779	0.0301006	0.921039
1810043G02Rik	125.527	138.285	124.749	130.115	146.003	146.424	132.309	139.674	0.0455939	0.918971
Zfp346	189.524	202.915	186.791	188.801	207.248	200.83	219.207	208.547	0.0186458	0.918882
Foxk2	489.406	459.347	510.492	484.061	523.069	531.809	546.576	518.229	0.0160746	0.916791
Mir421	34.3638	32.057	34.0468	33.9495	35.082	37.7754	38.5037	35.2979	0.0297071	0.916528
Mir125b-2	33.4348	32.5252	31.0799	31.1271	37.5517	34.216	35.151	32.9885	0.048596	0.916087
Wdr93	39.083	40.9025	39.7253	43.2601	44.3684	45.5897	42.6111	45.4025	0.0190436	0.915712
Vmn2r18	38.8394	37.0281	42.1365	37.2844	41.2638	43.7296	41.8786	42.8409	0.0465675	0.915006
Mrgprx1	32.9655	33.1114	34.8382	36.1836	39.6193	35.961	37.0784	37.2162	0.0258763	0.914754
Olfr1419	32.3375	32.9187	32.5022	34.3867	36.0986	37.4614	37.232	33.8226	0.0242427	0.913775
Olfr447	39.4886	44.0998	42.6179	39.6461	45.762	44.8085	44.2071	46.7354	0.0324245	0.913722
Mirlet7g	39.4885	38.6799	42.1763	39.7044	44.4172	43.0295	43.3531	44.3981	0.00896672	0.913534
Tmem234	128.118	132.644	131.229	119.965	137.884	141.416	145.598	135.643	0.0160709	0.913323
Mark3	717.819	672.508	675.818	764.437	779.571	779.329	782.039	761.486	0.0479508	0.912377
Grk1	46.0763	45.1645	46.93	48.5261	51.2482	48.7075	50.3433	54.4247	0.0242016	0.911946
Zfp940	56.4898	56.8374	56.3158	63.4198	66.4107	62.7471	61.2758	65.3921	0.0389369	0.911022
Syt6	71.6925	73.8357	70.6205	70.8557	78.251	81.0486	77.6619	78.6517	0.00047459	0.909355
Atp6ap1l	37.5759	40.8826	36.6915	37.4303	42.8045	42.8931	41.0037	41.3247	0.0172187	0.908075
Uba3	807.514	863.096	832.678	828.196	870.686	922.105	954.078	922.127	0.0087877	0.90801
Tmem74	47.4089	44.8887	49.421	42.516	49.5552	54.0091	49.9347	49.4008	0.0496695	0.908008
Osbp	490.56	508.275	508.269	563.931	581.533	576.374	542.029	582.958	0.0367171	0.907197
2210020M01Rik	47.8428	49.6748	46.7679	49.6408	54.7107	52.2267	54.8883	51.9452	0.00350789	0.907169
9230102O04Rik	46.7399	40.8775	41.8571	43.7438	46.7132	48.9799	46.5466	48.737	0.0325009	0.907013
Fam89a	57.976	61.2584	54.0236	54.1337	64.8309	61.3731	62.332	62.1817	0.0356845	0.906964
B130024G19Rik	49.9812	45.5886	48.0599	46.8169	54.4403	49.4063	54.8334	51.3657	0.0247746	0.906691
Zfp161	36.2867	36.9536	38.4467	40.293	43.5096	40.7836	44.0431	39.3231	0.0355212	0.90648
Egln2	249.008	216.429	242.323	234.503	274.144	256.235	267.086	242.168	0.049196	0.906342
Bicd2	226.383	223.111	233.607	254.153	261.985	241.657	258.96	272.846	0.0418068	0.905166
Tmem174	44.3847	46.3404	49.2855	44.2269	53.4284	48.8352	52.4483	48.921	0.0274475	0.904753
Idi1	336.834	351.875	316.351	314.003	346.392	366.379	357.334	389.245	0.0336133	0.903871
4933406C10Rik	44.277	47.1626	42.4065	43.6304	47.0573	51.8577	48.087	49.3862	0.0170652	0.903703
Tas2r135	44.4756	43.09	41.2972	43.6718	47.5886	50.6039	46.7081	46.066	0.0114018	0.90348
Ecel1	58.5977	57.2852	63.7807	63.2545	65.5901	66.4526	67.0967	69.7648	0.0197589	0.903363
Gm19894	34.7074	36.7271	36.1161	34.7078	38.7462	40.7978	41.0582	36.9052	0.0208816	0.903185
Anxa7	734.29	698.503	650.927	692.061	765.534	726.898	834.296	747.405	0.0451015	0.902947
Gm6812	43.6277	49.8234	44.5478	47.1646	49.1459	50.6784	53.5591	51.7235	0.0293719	0.902766
Amacr	261.55	258.552	282.04	263.651	285.211	299.835	316.605	279.111	0.0330313	0.902632
Cphx	44.0564	52.3719	47.7476	48.5419	51.2603	53.7703	56.1934	52.4378	0.0476201	0.901976
Mtfmt	204.82	196.183	183.847	207.919	224.057	236.497	205.626	212.98	0.0481671	0.901735
Defa26	51.5455	45.2347	45.9047	45.6819	51.9604	53.6358	48.7962	54.6017	0.0399719	0.901302
4930511E03Rik	43.0058	44.7547	44.9698	44.3275	47.5554	52.5298	48.4947	47.8687	0.0185382	0.901294
Hnrnph2	129.908	143.008	127.811	144.823	163.521	146.484	145.154	151.116	0.0462716	0.899838
Gm10818	49.1339	46.3193	48.6772	43.5956	52.2568	51.7446	49.9858	54.6436	0.0186929	0.8998
Rpl19	3681.42	3323.46	3471.39	3406.59	4012.4	3775.68	3816.84	3824.43	0.00768733	0.89977
Rgs21	39.7688	40.5273	42.1148	36.7949	42.5617	43.6096	48.3515	42.4885	0.048507	0.89941
4922502D21Rik	52.1063	53.0574	57.52	52.1886	61.7315	60.8817	61.445	54.9332	0.0281346	0.899079
A730046J19Rik	38.0977	41.9741	44.9109	42.2226	45.4585	45.5436	47.7125	47.2845	0.0363387	0.898958
Sgms1	105.878	97.6034	110.677	112.962	117.44	119.844	118.255	119.62	0.0365553	0.8989
Npc2	1671.71	1868.66	1690.66	1613.77	1999.53	1944.21	1846.77	1832.01	0.0318819	0.89797
4930467K11Rik	43.4586	43.7709	45.4171	46.4534	49.0663	54.3338	46.8452	49.2271	0.0407372	0.897868
Clk4	228.586	217.945	240.999	235.096	246.09	276.154	241.527	263.864	0.0387038	0.897816
Gm505	173.354	195.973	190.332	200.573	223.009	220.283	205.096	198.869	0.040183	0.897285
Atp6v1g2	95.3931	98.1013	108.117	106.524	109.743	123.411	113.894	107.923	0.0460057	0.897059
Mrps34	202.233	207.323	190.672	178.197	222.465	204.844	229.531	211.219	0.040082	0.896742
Orc2	217.921	232.663	214.724	214.806	224.795	256.093	259.109	242.537	0.0380691	0.89576
Dnmt3l	48.4355	49.099	52.9163	48.0686	58.8207	51.9292	53.7631	57.1348	0.0269856	0.895652
Skap2	582.464	607.35	677.128	608.639	659.771	670.283	742.63	692.207	0.039052	0.895363
Dna2	97.762	106.441	112.837	111.056	123.374	124.202	119.548	111.237	0.0316646	0.894922
Hyal2	278.616	270.536	258.679	261.331	298.885	276.605	308.646	312.669	0.020019	0.893346
Itfg1	1399.73	1574.67	1479.45	1382.73	1527.74	1687.96	1658.9	1661.55	0.0227487	0.892966
Ifitm7	45.7211	50.0216	49.9842	46.435	55.4938	51.9665	57.1853	50.5876	0.0256404	0.892808
Pdzk1ip1	61.4431	61.3886	55.0362	54.9455	64.0828	66.3842	67.2161	63.1684	0.0237679	0.892513
Olfr884	66.0067	63.9403	66.6825	66.4768	70.0213	75.8253	73.9585	75.1852	0.004175	0.891916
Lrrc36	42.0877	46.8241	41.1938	40.1174	50.3349	44.9257	45.5109	50.1165	0.0469435	0.891742
Samd15	40.7543	41.1173	43.6404	41.1671	43.0685	48.1532	48.9413	46.7943	0.021458	0.891536
Tk2	244.146	224.894	222.071	211.245	262.889	250.322	238.44	260.743	0.0219714	0.891309
1700030O20Rik	41.3144	41.0577	42.521	40.3315	47.0308	44.8001	44.5411	49.0521	0.0113695	0.891063
Camk2b	65.4765	61.0809	64.1325	55.7868	67.5235	67.9565	75.4318	65.7127	0.0478161	0.891015
4930480G23Rik	44.6202	47.4299	40.5905	40.7218	50.1592	45.9419	49.8573	48.6146	0.0407918	0.890989
Grin2d	47.9805	42.6579	49.1772	44.0483	54.0537	47.9244	54.1904	50.2698	0.041255	0.890649
Ttc13	546.316	651.689	601.196	601.719	723.265	680.405	649.594	642.841	0.04105	0.890514
Cdadc1	129.058	128.401	117.832	125.825	134.431	144.752	145.548	138.342	0.00580627	0.889968
Eif1ax	928.189	934.143	954.223	1006.08	1048.66	1017.72	1158.36	1072.58	0.0203887	0.889542
Ap4s1	74.9335	70.4024	77.5082	69.23	84.3912	80.057	78.3194	85.9659	0.0134099	0.888483
Nphp1	143.453	160.502	151.636	154.928	169.359	173.329	186.486	158.112	0.0383773	0.888304
BC024978	91.2301	82.7101	82.7933	91.9818	101.222	100.135	95.797	95.7596	0.0145992	0.887511
Insm1	90.2683	92.7569	89.4932	80.98	95.1189	108.421	96.9828	97.8478	0.0301516	0.88736
Cnot6	594.957	570.01	589.161	668.358	732.265	673.227	638.577	686.451	0.0381945	0.887189
4933408B17Rik	43.8796	40.5875	37.5438	42.3952	42.4507	46.273	48.1164	48.5725	0.0358518	0.886705
Cd1d2	34.7516	37.4466	38.9148	37.6257	41.2215	42.5187	43.1835	40.9316	0.00561467	0.886113
Car1	43.8307	40.798	38.1411	37.6858	46.6024	44.9914	46.4765	43.0158	0.0267647	0.886074
Slc16a8	56.764	52.7474	57.8303	52.5933	64.6388	63.6361	59.6148	60.3344	0.00841949	0.886034
Npr3	58.9179	54.1689	57.3446	54.3552	62.9053	64.9348	63.1655	62.7634	0.0043273	0.885793
Tapbp	86.5264	82.1531	85.4062	80.6802	91.3116	95.0933	90.7299	100.97	0.0113799	0.885379
Dpp10	41.7346	35.2234	36.272	35.7939	40.1585	44.3113	41.3522	42.6239	0.0404374	0.884699
AI481877	40.4909	45.7909	41.9882	43.1081	46.1059	49.0723	49.0167	49.5363	0.00811807	0.884618
Dnase1l2	57.2906	50.7006	54.6478	53.4779	58.4622	60.7053	65.9423	59.2683	0.0182633	0.884355
Fuca1	1385.1	1513.29	1548.15	1493.06	1549.09	1636.11	1850.95	1682.63	0.0465452	0.884031
Olfr1051	34.2438	33.031	36.9314	32.9459	39.2708	41.3518	37.4736	37.0782	0.0156573	0.883858
Atp1b4	49.5227	52.6024	44.1011	46.952	58.6351	53.9714	54.6033	51.3686	0.0369756	0.883793
Ms4a14	45.6359	47.5553	45.4372	46.0524	57.1495	49.3539	53.033	49.4723	0.0414921	0.883604
Mosc2	353.179	344.666	368.415	372.227	397.121	412.922	432.912	385.456	0.0110712	0.883369
Reep5	599.975	656.903	631.723	628.155	718.229	735.678	759.987	637.24	0.0436253	0.882721
Itgb7	55.4474	52.0667	51.0323	54.3273	65.3752	60.5247	54.5586	60.7481	0.0413315	0.882537
Pirt	47.7503	53.2759	50.9689	47.5959	59.3243	56.8358	58.6386	51.4466	0.0271952	0.882188
Gm12522	57.7407	69.4213	60.9594	63.4401	67.3799	73.0576	73.4196	71.3961	0.0333172	0.881889
2700081L22Rik	38.1374	40.2941	38.8175	43.615	44.8685	42.6835	45.0962	49.7795	0.0326556	0.881795
Msrb2	119.696	127.184	135.751	133.906	151.517	144.712	148.968	140.725	0.00981645	0.88158
Rhox11	36.5833	45.1806	39.3727	39.4664	42.8572	46.7954	46.3749	46.2011	0.0499088	0.881328
Jagn1	253.673	230.646	261.24	279.193	271.42	305.496	307.804	278.51	0.0448756	0.880953
Tcea1	601.788	531.174	586.337	524.071	621.319	659.213	599.858	667.104	0.0244576	0.880618
Atp6v0a2	541.367	570.652	529.586	587.106	695.984	585.289	616.227	633.922	0.0391831	0.880418
Esp3	32.9782	32.0653	32.3149	29.9952	35.8236	33.9133	38.6642	36.308	0.0129641	0.880066
Dlx1as	57.059	61.3461	52.2413	55.9525	70.5059	62.3612	62.2678	62.3704	0.0319606	0.879977
Npb	51.9709	52.5589	54.9657	56.4817	61.4653	62.2761	60.7827	60.9625	0.00376613	0.879792
Ptprn2	69.9379	75.3374	64.4958	76.0868	82.3347	84.9925	73.0601	84.5525	0.0453421	0.879725
Gm12597	70.2073	68.3736	64.5401	68.7932	82.1762	73.6032	73.18	80.2222	0.0183042	0.879464
Ppm1f	170.839	183.297	182.877	204.249	221.42	193.498	215.713	212.256	0.0334759	0.879432
Fam89b	800.224	845.701	853.778	905.18	999.896	927.036	1028.92	916.18	0.0169333	0.879354
Mmab	188.567	222.286	211.253	231.624	226.026	242.025	252.534	251.082	0.0434669	0.878625
Fam3c	358.017	395.639	349.045	394.659	398.587	448.301	417.996	441.781	0.0201827	0.87736
Tfap2b	41.9393	44.3838	42.1169	46.686	47.6	52.733	47.132	52.2119	0.01807	0.877047
H47	400.923	408.279	398.531	370.459	425.577	463.433	492.334	418.415	0.0404379	0.87689
Art2b	30.5427	30.1967	33.4291	30.7538	35.3368	38.4597	33.7619	34.9044	0.0144945	0.876877
D930048N14Rik	58.1829	60.7316	61.0511	53.2163	62.8578	67.1905	65.1916	70.7571	0.0159917	0.876634
Fzd6	54.3898	59.0388	52.7239	53.004	67.0475	63.4588	61.1348	59.0428	0.0134037	0.874234
Ccdc134	171.732	148.376	171.259	158.109	185.858	174.617	206.005	176.717	0.0443805	0.873894
Prss28	47.1303	42.3454	49.2045	48.796	47.8047	55.0879	55.6674	56.0625	0.0372463	0.873516
Ccdc136	55.6051	54.3125	60.8883	51.3749	58.9092	60.8369	69.8798	64.7275	0.0439396	0.873512
Larp1b	164.556	149.303	172.026	164.326	195.601	178.879	193.542	176.349	0.0140055	0.873503
Miip	89.6882	85.769	89.1333	99.2542	107.1	107.297	97.6028	105.001	0.0123743	0.872529
Tmem9	213.782	193.201	220.197	195.086	223.734	235.415	236.579	246.805	0.0129084	0.872401
Macc1	37.9841	40.0354	35.5347	33.7615	40.842	42.4915	43.0793	42.5739	0.0232037	0.871759
Iqcc	83.059	89.4109	89.7175	98.6615	104.545	114.802	96.1199	98.5523	0.0471917	0.871576
Sirt7	124.091	103.258	115.762	121.771	128.601	136.622	135.456	132.988	0.0277678	0.871111
Dok4	99.7763	109.079	97.6101	117.568	124.343	116.947	125.028	120.526	0.0341894	0.870982
Cdk17	249.725	260.324	255.115	234.231	300.476	255.363	304.11	288.187	0.0352794	0.870451
Tlk1	581.323	624.016	657.562	633.011	641.729	699.396	762.993	763.4	0.0416792	0.870408
Gpt	57.6368	62.7921	52.3968	63.666	71.1978	65.7095	69.1098	65.8268	0.034007	0.869954
Tmem107	69.8852	80.0485	80.1394	81.971	90.153	94.5161	92.7285	81.3591	0.0269037	0.869793
Nudt3	446.367	530.094	458.341	498.74	543.383	549.454	559.493	571.762	0.0268469	0.869363
Gm4710	41.1726	41.6567	47.3993	43.2388	50.1336	51.3477	52.7088	45.4343	0.0219292	0.868969
Uap1	316.211	319.616	375.319	366.821	367.524	408.813	415.24	394.571	0.036575	0.868751
4921509C19Rik	48.7211	47.6369	51.9388	43.2651	53.441	58.4282	58.4404	50.2553	0.0363678	0.868506
Cldn26	50.2604	49.3544	56.6641	57.4489	62.1502	62.1041	64.9177	56.9515	0.0250494	0.868377
Npcd	161.793	178.321	191.1	184.835	223.203	192.43	199.704	209.696	0.0250619	0.867903
Ing4	263.72	303.646	306.641	308.459	352.36	326.975	368.792	314.424	0.0331039	0.867832
Snord32a	3656.18	4236.25	4313.46	4433.01	4718.69	4756.38	4955.89	4743	0.0295989	0.867786
9630033F20Rik	107.866	118.176	117.945	124.793	128.769	124.645	145.453	141.518	0.0294682	0.867495
Arpc3	1245.3	1203.74	1110.14	1373.44	1506.2	1454.92	1445.01	1279.94	0.0430542	0.867493
Prkrir	464.018	472.157	498.492	494.841	507.811	604.622	557.727	554.479	0.0258832	0.867335
1700020O03Rik	136.428	134.169	134.734	121.815	153.847	154.226	144.135	156.088	0.00370419	0.866596
AI463170	54.889	57.6143	57.8234	65.2932	66.4666	70.5812	71.5822	63.409	0.0215258	0.866125
Slamf9	64.8065	64.8281	62.5994	60.8383	81.7296	68.1081	69.7262	72.6491	0.0430341	0.866054
BB019430	41.434	38.9631	36.0373	39.7868	49.1258	43.8213	40.4382	47.1672	0.0419865	0.865239
Dppa1	42.9094	40.2075	36.0216	38.4975	44.1141	49.479	46.6022	42.1229	0.0287725	0.864621
Zmym1	129.007	116.006	127.111	127.897	151.215	132.583	151.149	143.493	0.0129198	0.864429
Pex19	524.326	496.473	479.567	523.285	535.942	558.339	646.715	601.88	0.0391844	0.863747
Slc9a5	78.6144	74.6184	79.3178	87.4998	101.22	93.4611	89.5768	86.535	0.0234441	0.863152
Rbfox1	57.7658	54.8351	57.6737	50.8865	70.3111	61.7026	58.579	65.6895	0.0324261	0.86296
Chrnb3	38.1891	43.2736	40.6498	38.0623	46.1473	45.2014	47.8539	46.474	0.00830588	0.862655
1700072B07Rik	35.8538	37.2671	33.1534	39.0181	42.8102	42.4844	39.5125	43.6385	0.0108842	0.862548
Glrx5	556.826	557.08	561.596	547.037	656.237	617.478	710.974	595.024	0.0379557	0.861545
Scgb1a1	31.4094	33.1051	35.1264	38.1322	40.9513	41.9338	41.5518	35.5286	0.0374614	0.861267
Atp6v0e	1369.5	1426.42	1180.61	1375.13	1437.98	1479	1745.16	1552.45	0.0496839	0.861144
B4galt4	101.445	98.5563	110.655	98.7329	116.769	118.22	130.535	109.927	0.0224307	0.861053
Pikfyve	379.78	461.196	435.679	468.64	528.058	477.46	487.759	534.899	0.0321934	0.860525
Hspd1	670.449	639.938	733.624	671.681	773.958	723.766	891.528	766.85	0.0467395	0.860458
Tbc1d16	205.923	213.535	215.935	216.714	234.829	241.104	245.771	269.187	0.0144419	0.85994
Ufc1	324.825	280.3	295.411	301.597	319.842	348.825	351.369	378.715	0.0193934	0.859433
1110059G10Rik	144.324	148.412	135.117	155.359	153.782	174.795	188.121	161.915	0.0421922	0.859415
Tas2r137	40.9878	45.3825	44.7311	40.3233	50.5465	48.5985	47.1729	53.1783	0.00856938	0.859288
Whsc2	275.661	276.676	296.603	257.557	316.46	350.051	324.588	296.813	0.0181155	0.859141
Car15	55.8468	58.4765	49.8005	53.7213	61.8982	57.9707	63.5542	70.153	0.032322	0.859092
Katna1	165.741	164.201	175.133	167.462	184.598	189.806	209.344	199.157	0.00902694	0.859027
Aptx	118.873	141.433	123.939	137.311	149.945	157.971	156.418	143.019	0.0191759	0.858735
Gm12575	40.0457	39.8257	40.9752	35.5358	46.5151	49.3718	45.297	40.9259	0.0272942	0.858726
Chi3l4	39.1946	38.991	37.2381	45.1565	46.5239	49.2277	46.8752	44.404	0.0224481	0.858577
Ash2l	273.708	321.031	332.276	292.437	317.366	387.269	366.183	349.628	0.0453205	0.858499
Cuedc2	370.706	326.082	338.81	337.551	423.28	389.631	429.062	357.931	0.0325372	0.858269
D230004N17Rik	67.1082	73.3144	68.7599	77.1874	82.2597	94.5993	76.6853	80.1515	0.0486548	0.858176
Farsa	135.767	134.045	123.993	146.045	174.899	157.729	141.214	156.032	0.0397582	0.857076
Dusp18	276.857	284.655	328.565	326.041	344.994	386.124	328.37	360.652	0.0318873	0.856336
Snrnp40	231.907	241.427	282.489	257.029	292.187	270.855	312.587	307.593	0.0267932	0.856012
Ppib	2383.08	2631.7	2839.9	3028.34	3059.22	3245.01	3271.94	3148.02	0.0386897	0.855301
Rps9	377.446	426.856	343.856	422.792	462.45	463.722	466.543	444.338	0.0395336	0.855147
Ppp1r18	64.8166	53.5043	67.2868	61.8515	76.7815	64.7264	73.4325	74.673	0.03949	0.854447
Sel1l2	39.0808	33.3254	39.5287	36.6647	41.4404	43.945	47.0539	41.498	0.0173854	0.854329
Snord2	253.593	261.6	236.319	263.499	282.884	280.929	304.677	319.649	0.0105982	0.854286
Lrrc45	125.928	108.315	131.511	138.239	153.612	147.927	150.324	138.531	0.0346933	0.853656
Arl3	862.717	742.599	929.038	915.58	1025.48	1028.42	1058.08	930.309	0.0317298	0.85346
Tmem120a	218.545	220.297	192.905	215.318	250.597	226.566	277.622	238.229	0.0360768	0.853025
Ddx28	71.0468	71.2892	68.3488	80.5111	88.3461	84.5269	82.3863	86.3555	0.0109284	0.85241
Prepl	224.995	220.308	236.811	271.437	268.808	279.524	281.772	288.959	0.0307373	0.852098
Dennd1a	103.365	88.1936	100.675	105.825	126.694	118.261	111.537	110.9	0.0181272	0.851661
Bin3	948.427	756.284	919.018	900.991	934.502	1092.71	1125.07	987.361	0.0472578	0.851455
Cisd1	159.138	179.218	167.929	158.241	206.069	177.628	211.171	185.684	0.0275456	0.851355
Mms19	170.297	201.789	168.726	194.934	230.216	221.787	209.924	202.723	0.0241718	0.850918
Lztfl1	87.0697	92.2028	92.5918	99.517	112.158	110.054	99.0076	115.289	0.0115814	0.850799
Olfr1273-ps	28.7856	27.4828	29.9831	30.6216	36.9612	33.4052	36.7078	30.3045	0.0390132	0.850736
Tmem208	168.38	158.835	194.898	173.727	207.244	217.295	204.745	188.737	0.0211186	0.850639
Mad1l1	184.625	225.535	219.097	220.174	261.002	264.534	250.343	222.788	0.0309286	0.850565
Mir9-3	51.5156	52.1293	61.0643	59.9209	61.3598	65.322	69.0302	68.4069	0.0213253	0.850489
Chmp2a	1195.05	1223.14	1078.18	1287.13	1274.97	1478.44	1559.1	1312.02	0.046174	0.850472
Gm2382	288.022	262.4	278.263	302.22	308.915	353.36	336.593	332.238	0.00698093	0.849597
Ppcs	88.446	97.4598	88.8255	81.9769	107.373	109.275	107.486	95.765	0.0119574	0.84951
Lsm6	297.978	297.008	337.673	340.938	364.817	416.212	375.72	342.664	0.029761	0.849397
Ccdc102a	91.8967	78.4989	99.3086	87.1597	99.9168	112.598	98.1152	109.717	0.0318163	0.848974
1700013G23Rik	53.9382	56.3658	63.3568	55.3239	60.4742	73.662	66.3122	69.326	0.0283847	0.848801
Fgf12	46.7742	44.8615	43.5062	49.4371	53.1145	58.1554	53.7239	52.5043	0.00398533	0.848647
Stard9	112.541	105.791	111.571	119.517	139.596	133.211	135.805	121.021	0.00812272	0.84855
Gm10388	42.5855	46.3782	44.918	51.3045	59.0223	56.0201	51.2812	52.0267	0.018336	0.848115
Chst11	951.935	918.494	988.661	1036.51	1252.64	1185.48	992.422	1163.83	0.0429607	0.847907
Gm10690	43.8961	46.1546	42.4368	50.5255	51.2735	58.4551	51.3368	54.8683	0.0154783	0.847543
March9	77.7636	66.7852	78.7881	75.8972	82.9323	80.4703	93.863	95.9385	0.0329047	0.847199
Mrpl42	166.218	205.539	172.631	175.514	208.511	208.037	238.505	195.399	0.0418762	0.846493
Chfr	247.383	249.487	235.235	299.069	296.319	318.406	313.039	292.208	0.0360478	0.845245
Lrpap1	605.39	624.936	586.551	510.375	736.509	646.708	705.027	665.292	0.0172347	0.845187
Chmp4b	889.067	822.999	826.669	864.866	1076.62	999.119	964.556	987.467	0.00272245	0.845036
9930104L06Rik	68.3139	62.3845	71.315	80.1863	78.6684	78.2224	89.8107	87.3301	0.0359709	0.844829
Mir148b	34.6456	38.7635	40.8759	35.2749	44.0124	46.5122	43.1749	43.3323	0.0111796	0.844819
Rab6b	92.4357	102.521	112.433	108.587	126.545	118.844	123.428	123.619	0.0163705	0.844732
Gtf3c2	41.1431	42.9883	51.6725	52.0381	58.578	55.7929	57.32	50.7158	0.0492919	0.844588
Gm9340	51.9503	43.3916	47.9518	43.2639	60.207	55.6227	49.2454	55.826	0.0314534	0.84453
Pex5l	55.9063	64.1836	60.9789	67.9751	80.6637	73.0945	68.2351	73.0167	0.0192851	0.844189
1110008F13Rik	873.584	926.175	888.075	926.529	992.163	1069.53	1169.36	1051.04	0.0147138	0.844065
Gm3453	35.7303	32.4813	32.3339	40.1478	40.9276	42.3709	42.8152	40.609	0.0332312	0.843875
Dennd3	156.538	139.194	136.675	158.839	185.759	190.12	157.244	167.551	0.032151	0.843825
Zbtb22	126.556	130.503	112.195	135.342	146.777	146.144	160.856	144.353	0.0110397	0.843622
D830044D21Rik	38.6901	42.1806	47.6662	38.6213	45.5406	52.899	52.044	47.7017	0.0318502	0.843443
Cyp2d26	55.0091	48.6424	54.9902	51.7429	60.6386	61.4104	66.7015	60.8855	0.00343099	0.842766
Zfp668	68.3433	69.8037	77.7912	78.4785	78.4887	88.1122	85.7042	97.0669	0.0294459	0.842703
Dnahc2	51.8554	60.155	59.6354	61.421	63.7739	68.7252	66.3787	77.7118	0.029863	0.842645
Polr3k	220.238	271.458	254.33	265.542	280.859	303.536	304.214	312.332	0.0169687	0.842313
Vps36	264.455	354.132	336.736	331.49	363.113	384.562	405.094	375.485	0.0467971	0.842014
Cyp1a2	38.5207	51.31	46.5951	47.893	59.982	52.6999	50.4339	55.9576	0.0463153	0.841356
9130206I24Rik	88.3369	116.601	104.517	116.611	132.649	119.699	132.126	122.029	0.0495161	0.841191
Tmem14c	649.471	715.745	699.314	652.06	810.389	844.187	857.293	720.196	0.0166436	0.840512
Krtdap	55.524	52.1128	59.4014	46.2777	60.7504	71.8019	57.5644	63.907	0.0492218	0.839748
Ncstn	1450.18	1887.17	1755.78	1630.75	1834.67	2051.61	1931.04	2193.31	0.0388936	0.83937
Zbtb7a	92.2545	95.2015	85.4136	74.6763	112.331	110.686	92.7249	98.4111	0.0448989	0.839172
Tmem11	62.4314	78.5223	71.1569	74.6684	84.9307	87.7162	83.087	86.109	0.0235655	0.83892
Htr3a	47.4399	46.3509	54.7175	49.0565	56.3721	66.8411	55.6855	56.617	0.0302797	0.838861
Fam82b	74.5869	87.7536	79.4825	89.2616	112.044	93.1368	94.3678	95.4562	0.0319863	0.838177
Fam188b	80.793	86.0528	100.432	105.937	109.795	104.085	119.094	112.503	0.0470666	0.837788
Zfp85-rs1	75.9023	72.0786	62.2218	64.7375	80.0712	76.3191	93.0759	78.8939	0.0355676	0.837313
LOC100862150	46.6219	39.076	38.2937	40.0766	47.4927	50.0562	51.3688	47.1421	0.0162596	0.836828
Disp2	61.7093	53.1812	56.5007	48.1685	66.9137	60.2356	69.955	65.2682	0.0252498	0.836825
B3galt1	55.6459	60.6553	59.0245	50.9042	67.8234	70.3143	68.0645	64.2319	0.00739031	0.836543
Lsm7	233.745	241.517	231.657	261.704	316.546	291.287	299.569	250.555	0.0344668	0.836494
Gm10445	36.1881	39.1315	37.1465	41.0586	46.1017	48.505	43.4405	45.93	0.00226993	0.834476
LOC545261	61.3618	55.4382	62.8583	48.7716	69.6803	67.5606	68.4816	68.2203	0.036829	0.83386
Cmc1	131.82	113.017	128.744	119.073	141.165	143.476	153.721	152.594	0.00473444	0.833657
Zfp319	84.8123	83.2956	84.0579	99.7692	114.6	103.584	96.95	107.148	0.0173045	0.833412
Fam161b	55.3518	64.4249	66.2381	64.1553	79.8006	81.5284	68.658	70.3457	0.023928	0.832977
B9d1	132.454	141.483	148.726	141.209	174.084	183.67	176.916	142.325	0.0477422	0.832906
Csnk1g2	690.744	709.715	685.866	871.719	966.994	784.717	922.641	878.442	0.0460255	0.832597
Ift20	1106.6	1019.42	1236.24	1042.44	1231.76	1498.56	1261.48	1299.6	0.0300593	0.832425
Sybu	54.4045	48.8704	46.1867	40.5854	60.9766	53.6591	57.2335	56.5317	0.0357446	0.832076
D030056L22Rik	108.675	102.87	131.344	100.753	138.94	135.303	131.58	127.913	0.0427649	0.831201
Kdelc1	346.876	279.617	276.869	307.155	356.568	410.448	370.457	318.962	0.049561	0.83115
Rilpl2	100.99	79.0291	80.2609	80.8964	100.303	96.8168	107.055	106.642	0.0366328	0.830483
Mrpl46	74.9021	87.6646	77.0836	76.4409	101.283	94.8877	93.7974	90.7871	0.00530462	0.830168
Tmem106c	441.838	456.51	475.916	420.959	455.833	570.562	572.964	564.976	0.0402463	0.829457
Srp14	332.85	414.484	318.193	378.542	447.43	449.601	439.353	406.201	0.0342682	0.828693
1810009A15Rik	412.773	417.146	420.958	475.22	526.661	547.9	527.464	481.125	0.00464614	0.828599
Gm10436	28.7078	37.9896	34.3989	34.3967	46.1182	37.8653	42.4233	37.141	0.049039	0.828461
Mrpl32	131.781	148.57	144.598	108.554	149.087	164.822	175.855	154.25	0.0489655	0.828403
Psma4	595.492	617.521	548.782	658.995	679.478	753.923	759.614	730.276	0.00580564	0.828104
Taldo1	159.756	194.137	220.255	181.845	241.769	231.848	228.562	211.068	0.0442828	0.827807
Crip2	619.062	700.313	633.53	633.265	831.345	746.003	778.95	768.995	0.00191457	0.827497
Vamp8	233.779	229.385	224.682	267.161	282.276	291.036	292.197	289.472	0.0117054	0.82686
Mrps25	124.32	108.144	116.858	113.263	146.374	123.5	141.509	148.203	0.0146923	0.826655
Rap2c	234.811	250.108	253.271	288.143	298.915	349.321	292.811	300.971	0.0209807	0.826342
Cdk18	85.7089	79.7586	92.8437	106.565	111.551	114.377	103.568	112.292	0.037084	0.825907
Leprel1	943.174	1221.09	1084.3	911.911	1266.45	1328.34	1131.51	1312.56	0.0468004	0.825678
Trappc2l	375.731	343.84	433.265	372.744	451.968	485.558	497.911	412.275	0.0239084	0.825659
Gpatch2	70.761	59.1535	76.8985	71.9987	91.5539	87.1681	72.2055	86.8153	0.0406959	0.825515
Rab30	75.0755	61.3104	79.694	65.7668	80.5153	97.0351	84.2685	79.661	0.0427716	0.825368
Nop10	1186.64	1369.47	1297.25	1445.5	1525.03	1740.28	1643.15	1513.24	0.0107209	0.82515
Rnf20	246.407	247.71	267.116	264.276	323.181	318.304	303.855	297.652	0.00054564	0.825033
Mir133a-2	42.5244	34.2588	39.8187	33.4893	42.3143	45.3041	49.1312	45.1746	0.0270515	0.82502
Pwwp2b	110.513	144.316	143.096	148.352	182.651	153.235	168.391	158.227	0.0403247	0.824566
2700046G09Rik	76.9166	74.7373	99.7301	84.9775	106.278	103.68	100.417	97.5695	0.0447205	0.824528
Arl5a	910.568	775.589	741.509	812.262	1100.06	993.193	980.39	856.763	0.0343846	0.824324
2310040G24Rik	55.8629	51.7097	56.868	69.525	74.2934	69.0629	68.139	72.4319	0.0405854	0.824034
D630003M21Rik	56.2432	52.3069	61.7507	67.6107	71.8148	76.6986	64.5217	75.6836	0.0271607	0.824026
1500011B03Rik	78.4512	86.8763	100.118	83.2415	104.293	99.6318	121.154	98.4251	0.0376316	0.823338
Prkag2	106.669	126.782	122.249	132.441	147.827	139.994	164.421	141.582	0.0151939	0.822031
Mir92-2	38.2665	31.3267	38.8224	39.2908	45.3038	47.6714	38.0578	48.9288	0.0416408	0.820765
Kras	311.467	338.83	355.397	355.762	397.95	476.132	397.457	387.362	0.0278293	0.820697
Irf1	80.3526	85.3491	97.7347	88.5535	121.49	98.9289	99.5794	109.118	0.0276328	0.820267
Zmynd8	235.682	207.17	221.848	220.74	314.132	243.411	250.122	271.949	0.0490802	0.820146
Coq2	158.497	159.284	133.28	152.328	194.898	176.311	190.74	174.257	0.00617784	0.819591
Myl12b	865.207	808.779	832.761	1035.22	1086.51	1073.87	1108.8	1053.05	0.0287119	0.819478
Sf3b5	264.835	279.549	249.938	220.609	351.447	304.334	279.55	304.402	0.0295061	0.818669
Ccdc13	95.0426	103.93	114.882	95.8108	119.936	142.802	127.068	110.81	0.0366057	0.81832
Dennd5b	125.164	141.516	134.857	154.814	166.626	166.156	182.671	164.682	0.00822867	0.818004
Birc5	116.863	116.264	141.136	140.997	152.384	177.991	153.291	146.486	0.0277133	0.817678
Fnta	358.542	453.582	385.865	429.306	446.754	499.14	540.684	504.075	0.0199462	0.817468
Git1	684.222	855.285	759.194	837.832	1068	886.905	942.094	940.104	0.0189534	0.817422
Ppp1cb	105.588	113.841	86.5844	100.472	119.247	125.224	121.908	131.066	0.0208001	0.817147
Uqcc	155.828	153.79	132.718	158.064	191.792	187.869	170.55	184.624	0.0046578	0.817053
Olfr888	35.5519	29.1634	36.3806	33.6741	42.5169	38.3376	43.2591	40.8878	0.0104847	0.816782
Tcta	117.028	137.427	132.132	139.058	139.064	155.231	183.548	166.461	0.042159	0.815832
Arhgap21	329.56	378.174	378.844	455.586	473.612	485.368	416.738	515.603	0.0412357	0.81539
5730469M10Rik	368.272	447.61	444.453	425.89	531.67	500.33	515.712	520.928	0.00953336	0.815138
Hist1h2bc	1977.47	1973.9	1698.49	1706.85	2517.73	2240.81	2084.46	2192.75	0.0140091	0.814178
Rab28	194.635	214.586	243.781	234.047	283.349	230.564	268.755	306.973	0.0449199	0.814073
Prkcz	72.9591	55.1393	53.6361	56.3429	79.7733	72.0967	73.7421	66.8628	0.0498511	0.814009
Fbxo31	171.102	191.673	194.539	213.262	257.209	242.798	241.688	205.038	0.0220729	0.813932
Snn	193.1	190.443	194.712	187.717	262.351	243.022	214.633	221.471	0.0258813	0.813587
Pknox2	156.441	171.626	206.135	175.113	245.468	223.528	190.667	212.331	0.0393214	0.81344
Arl6ip4	346.594	366.128	376.078	417.717	501.196	444.403	489.574	418.637	0.0133402	0.81266
Obfc2b	360.516	326.126	265.8	364.188	402.875	439.901	352.016	425.391	0.0449311	0.812643
Med18	68.9961	77.0417	72.8018	83.3396	96.711	101.235	87.1212	86.8114	0.0106638	0.812575
Wbscr22	274.251	246.978	318.056	292.249	397.352	367.261	323.669	305.489	0.0470393	0.81185
Rpl21	73.2333	79.3506	84.7031	78.2482	94.3929	95.7093	103.863	94.9152	0.0013247	0.811393
Cyc1	378.771	448.401	358.338	380.835	464.768	480.797	547.268	438.155	0.0248907	0.811162
Glrx2	63.8141	70.5892	63.1261	57.9524	82.618	81.7509	76.4506	74.4879	0.0044591	0.810263
Zscan29	105.335	123.164	100.056	100.93	135.702	130.736	142.882	120.739	0.0127756	0.810259
Bin1	361.234	383.153	353.909	422.917	503.899	400.944	510.277	462.533	0.0296324	0.810168
Gnptab	360.736	420.814	461.374	407.896	495.125	511.739	524.989	506.855	0.0145525	0.809738
Nip7	234.847	217.294	211.985	265.011	334.849	256.324	293.564	263.081	0.0498102	0.809481
Ldhb	351.177	396.932	440.35	470.117	506.565	507.213	568.928	466.822	0.0278159	0.809247
Mrpl36	55.2225	56.9301	52.0187	58.3069	69.3354	76.6855	63.3516	65.8171	0.0129579	0.808454
Ift74	108.66	118.399	92.204	111.165	119.991	143.826	141.067	127.625	0.017857	0.808303
Ak5	254.557	232.272	287.588	258.814	346.813	296.022	337.59	297.887	0.013019	0.808277
Nat14	76.423	74.0627	75.9398	79.3135	94.1542	96.0776	96.776	91.374	3.30419e-05	0.808017
Mir18	44.811	37.332	44.3935	44.5058	60.6266	53.1061	47.3005	50.7672	0.0280141	0.807563
Eif1	66.9073	64.3866	76.6115	86.0332	96.464	89.1992	98.0473	80.2879	0.0351102	0.807527
Fxyd6	83.4838	83.4422	96.5726	98.8267	118.423	99.5406	111.806	119.099	0.0126099	0.807197
Gm19818	53.6593	58.9306	43.2246	48.3338	60.0948	63.3697	70.3824	59.1766	0.0302986	0.806835
Tmem121	89.7931	94.327	99.5136	83.6966	106.77	110.553	123.81	114.179	0.00449959	0.806765
Alg1	210.568	239.05	223.119	244.675	304.37	242.643	319.116	271.285	0.0407477	0.806578
Gsdmcl2	62.2578	62.8619	64.0897	74.1616	79.7788	82.0125	77.5329	87.3118	0.00483384	0.806314
LOC100862607	44.7274	54.1977	56.2411	45.1714	73.1735	57.8469	59.9247	57.5214	0.0472191	0.806296
Ints5	118.91	124.387	98.4487	109.783	153.735	130.04	132.63	144.311	0.0135068	0.80527
Mir365-1	51.0958	42.7581	40.5176	50.3156	56.6126	57.3336	59.7946	55.7996	0.0194674	0.804595
Rnf220	78.6002	75.8888	86.0721	75.1039	104.558	83.928	105.24	98.8007	0.0217536	0.804189
Mbtps1	492.661	556.704	477.807	519.588	640.821	596.995	693.153	615.751	0.00397311	0.803685
BC030336	403.013	389.365	424.472	455.018	444.462	548.478	548.576	539.598	0.0186387	0.803352
Il20rb	56.7212	44.6078	48.839	48.3024	65.2448	64.5252	61.475	55.9371	0.0110017	0.802932
Dhcr7	579.274	733.392	509.946	687.683	837.79	718.71	816.42	754.042	0.0481658	0.80279
Pofut2	458.672	528.262	457.695	503.978	682.671	605.155	617.823	522.882	0.0264439	0.802381
Dnlz	238.936	281.261	279.707	245.954	359.257	327.579	320.492	296.791	0.00935334	0.801964
Cebpa	63.9286	60.2094	57.3717	64.5365	79.8366	77.3302	69.6445	80.0265	0.00303277	0.801877
Atf6b	307.567	332.666	304.302	331.204	420.047	378.678	426.583	365.689	0.00741427	0.801849
Olfr1537-ps1	38.6166	40.662	33.5007	38.3677	45.175	49.4328	51.7453	42.3488	0.0131644	0.800983
Mrfap1	575.955	647.754	541.43	691.874	831.896	710.895	802.052	722.958	0.0152381	0.800903
Msl1	201.2	214.295	255.595	219.856	290.696	303.339	279.291	239.149	0.0231747	0.800869
Vmn1r214	37.3861	36.9051	37.3303	38.348	42.5142	53.4851	48.921	42.4351	0.0391573	0.800455
Endod1	255.703	264.218	301.704	318.723	330.578	372.672	385.5	336.366	0.0126352	0.800179
Myl6b	123.057	140.615	131.622	100.98	178.764	161.662	140.515	139.711	0.0495155	0.7996
Mir1981	49.0277	60.2475	59.6553	68.1436	71.1872	80.2681	68.3255	76.741	0.0241022	0.799517
Spint1	53.9285	47.2962	66.1996	52.8148	73.6331	61.9008	75.2274	64.996	0.0370674	0.798671
Rbx1	869.676	794.607	866.014	884.067	979.553	1099.13	1213.5	985.235	0.0238146	0.798229
C630028M04Rik	36.1117	43.0164	45.5869	42.2573	54.1463	55.8133	51.384	47.8373	0.00768182	0.798219
Snx1	1942.99	2020.51	1678.2	1828.96	2215.8	2632.11	2231.16	2280.54	0.00993788	0.798181
Aste1	139.742	142.386	129.536	134.454	152.658	187.547	171.863	172.195	0.0113323	0.798114
Gpd1	665.155	775.899	684.007	867.039	890.633	831.051	990.655	1037.68	0.0284214	0.797889
4930525M21Rik	50.6287	41.6298	44.1237	43.034	59.912	48.5619	55.1469	61.6985	0.0213452	0.796275
Prrt1	98.2377	118.269	111.228	102.367	147.502	139.71	131.439	121.797	0.00886674	0.795824
Brp44l	913.811	942.011	906.33	1007.34	1087.01	1149.87	1364.59	1136.48	0.0228597	0.795596
Bend3	80.6968	90.5971	95.176	93.4955	118.892	102.194	117.658	114.173	0.00376175	0.79477
Fam32a	424.719	378.048	457.014	351.301	510.42	522.037	563.721	431.275	0.0295259	0.794633
Zfp418	57.4667	59.5282	60.9643	74.2333	75.5501	87.211	78.1986	76.5745	0.0149702	0.794221
6530401N04Rik	203.575	181.718	183.779	196.849	220.386	267.824	256.555	220.205	0.0200143	0.793726
Aldh6a1	35.9439	39.6785	36.7287	44.5485	45.0905	56.1272	44.8342	51.6637	0.0259759	0.793562
Coch	49.7698	48.2184	48.6011	47.357	53.6947	65.6619	59.0738	65.9911	0.0215632	0.793491
Unc79	53.4621	53.1018	66.5548	64.2693	85.0041	73.9322	65.924	74.5016	0.0263076	0.79298
Ppp1r35	255.231	276.351	260.384	319.294	318.952	399.896	312.258	370.283	0.0336421	0.792971
A230045G11Rik	266.528	263.201	249.382	267.769	377.479	333.666	319.316	290.602	0.0290393	0.792454
Vps29	230.145	238.027	235.273	194.109	306.347	251.075	274.95	300.89	0.0122021	0.792011
Smarcd2	84.3217	64.7618	84.8174	70.6238	99.5613	97.394	81.5185	106.357	0.0327961	0.791321
Usp2	212.097	201.702	201.187	234.692	290.349	271.761	268.76	243.395	0.00447194	0.790938
1110001J03Rik	62.2566	70.2747	69.6952	82.5184	93.5485	99.1957	80.4855	87.2231	0.0174661	0.789965
Uqcr10	116.901	113.396	96.7894	109.543	155.39	144.238	116.532	137.326	0.0285405	0.788873
Hist1h2af	1291.84	1488.02	1671.16	1897.77	1862.58	2093.93	2229.47	1872.54	0.0390671	0.787835
Kifc1	89.7092	116.241	98.0811	86.3556	138.385	128.296	113.723	115.126	0.0258147	0.787818
Gria4	1260.31	1379.77	1225.56	1469.62	1644.05	1945.59	1429.75	1753.24	0.0357387	0.787767
Sfrp4	56.3751	53.9749	59.3263	62.5825	74.6704	80.123	64.3267	75.8654	0.0107828	0.787357
Fbxo2	59.6529	70.0438	82.463	66.7461	73.8766	92.1907	94.5432	93.8242	0.0332494	0.786903
Exosc1	464.119	432.501	404.164	479.74	535.068	526.082	656.03	549.08	0.0188806	0.785666
Zfp691	108.483	106.938	144.683	132.089	145.273	155.686	144.046	181.491	0.0382083	0.785629
Casp8ap2	169.354	154.15	126.623	157.305	186.87	190.023	176.216	220.177	0.0192014	0.785522
Gabpb2	152.816	139.696	128.598	139.785	176.845	176.939	165.335	195.268	0.00327089	0.78514
Cdc37l1	162.014	151.61	132.698	152.122	161.125	199.546	213.91	188.724	0.0255185	0.784017
Gcat	70.3514	74.404	74.014	91.0631	89.1002	114.186	102.454	91.4119	0.0268374	0.780136
Ube2g2	273.63	269.201	269.463	241.482	371.376	319.767	297.02	363.011	0.0176977	0.779896
Lipe	72.3823	62.2722	90.5902	84.7401	103.356	98.9824	102.792	92.7143	0.033346	0.77916
Crhr2	55.2203	50.4831	52.978	56.7702	70.4299	74.7027	65.2472	66.2408	0.00179445	0.778871
LOC100862483	50.3293	53.4548	54.0939	59.331	57.7472	72.1457	71.1653	78.0358	0.0286128	0.778264
Mvd	168.704	220.56	221.723	264.356	286.413	298.517	294.146	248.53	0.0402394	0.776285
LOC100862467	45.9118	40.1167	47.4965	44.2176	56.4616	62.5003	63.5002	47.1859	0.0327389	0.773979
Abhd3	102.192	93.6989	94.9437	85.6802	105.354	108.659	136.643	135.874	0.0402347	0.773878
Adam15	89.2096	71.383	93.081	85.4638	118.654	109.819	107.537	102.46	0.00658759	0.773454
Mrps18a	187.239	177.057	182.23	173.07	230.094	207.888	266.465	225.983	0.0199167	0.773402
Cables2	92.3132	89.605	114.136	107.566	142.116	142.231	119.816	117.947	0.0167404	0.773054
Rad51	109.303	140.845	141.717	152.27	150.747	175.023	209.687	169.086	0.043519	0.772325
Tmed10	121.946	141.315	118.187	107.472	129.288	163.978	176.145	164.453	0.0298272	0.771332
Lactb	93.1405	110.81	89.8847	119.931	145.537	112.426	140.422	138.546	0.0244943	0.770614
Cntnap1	68.6994	80.594	86.0666	74.0346	102.911	97.9138	104.511	96.1643	0.00400844	0.770595
Cxx1c	300.902	299.164	278.712	222.617	350.209	315.37	345.33	419.356	0.0293071	0.770064
Mtap2	144.264	185.798	214.212	223.238	245.802	292.231	225.647	233.062	0.0496923	0.77002
Olfr1502	58.0037	53.3271	64.563	80.3157	94.65	76.0656	76.788	85.2882	0.0431275	0.769879
Mapk12	160.521	144.129	202.17	203.88	240.624	237.545	240.106	205.047	0.0294531	0.76972
Pnp2	32.558	32.9721	36.7389	34.8558	41.253	45.0149	49.2894	42.6964	0.00449464	0.769268
Slc29a3	623.205	502.612	433.738	505.964	718.901	532.733	714.01	719.481	0.0442549	0.769245
Col4a6	91.2204	85.8095	109.061	111.416	128.813	135.143	130.383	122.835	0.0126362	0.768612
Zfp120	49.9141	52.6146	47.1984	49.3604	65.7033	58.5513	70.2999	64.5258	0.00416258	0.768439
Zfp933	78.053	89.7155	108.584	110.515	136.325	122.978	125.794	118.461	0.0247715	0.768265
Fam114a1	545.004	662.763	601.335	552.223	681.907	860.679	783.189	751.093	0.00957448	0.767445
Twf2	334.742	344.062	420.061	473.667	519.267	541.766	522.832	466.166	0.0275508	0.767078
Pcyox1l	205.595	204.825	224.573	226.656	329.804	278.308	284.171	231.659	0.0418114	0.766632
Lrfn4	97.0732	87.6232	108.189	119.866	119.555	145.525	123.832	150.164	0.0227633	0.765663
Gm10687	112.079	145.064	117.611	144.417	153.857	182.313	183.261	159.567	0.0139481	0.764614
Hdac2	631.056	657.637	663.539	509.266	781.393	859.705	724.765	855.51	0.00796637	0.764114
Gm19902	41.189	45.5443	43.6075	46.5534	56.6041	58.8524	60.3885	56.1113	0.000130811	0.762618
Gm2046	52.6631	58.0489	67.8008	42.0843	65.7251	71.9983	69.931	81.7627	0.0416682	0.762212
Fbxo9	154.679	152.877	148.166	151.885	206.779	218.642	178.383	193.984	0.0107473	0.761616
Mir3101	40.2191	42.0834	40.6374	57.3723	65.0824	59.2141	56.6106	56.4175	0.031949	0.75977
Purg	98.8314	94.6658	105.148	101.465	127.433	146.205	129.205	124.319	0.00363202	0.758989
Dennd1b	117.088	133.579	142.627	143.056	157.022	192.878	185.862	171.701	0.00607616	0.75813
Npr1	67.2157	79.7023	81.8115	76.7046	98.4362	96.6617	108.77	99.2721	0.00127609	0.757637
Adal	69.1075	90.8958	92.6049	110.566	120.207	106.357	125.499	128.392	0.0319795	0.755897
Rassf2	186.522	271.565	316.163	292.458	310.42	378.564	343.891	378.371	0.0477428	0.755863
Lefty1	75.7252	64.776	80.5233	70.7428	90.2546	110.662	92.2872	92.8977	0.00832945	0.755675
Stx12	232.531	254.916	201.086	206.145	343.015	278.135	247.633	316.456	0.0318973	0.754851
Ppig	112.132	89.831	131.345	130.485	130.984	165.303	145.709	173.017	0.032377	0.754118
Cep57l1	85.0303	80.0319	81.1626	79.7018	122.312	101.596	113.729	95.0966	0.0197623	0.753182
Shisa4	436.004	439.367	476.663	573.279	605.142	683.544	710.961	566.501	0.0136322	0.750274
Uxt	244.426	210.179	185.577	297.25	299.76	331.77	338.29	280.973	0.0393929	0.749469
Adamts10	76.2547	79.3784	104.743	113.88	125.659	126.3	129.83	118.015	0.0389443	0.748808
Atp5k	354.208	439.158	361.822	384.661	588.682	568.991	483.098	416.576	0.0391327	0.748463
Nprl3	129.357	198.587	156.206	184.051	201.831	219.176	215.492	256.941	0.029036	0.747898
Zar1	38.8036	37.3906	35.3564	44.5677	44.6687	58.5905	50.3622	55.9738	0.0144146	0.744856
Fbxw5	347.413	517.125	486.463	401.161	600.332	474.984	662.477	615.265	0.0360157	0.744632
Gm9199	101.031	88.9312	99.3578	102.303	113.965	124.014	148.295	140.711	0.0164336	0.743139
Hrsp12	193.911	215.074	163.355	149.569	230.311	256.392	248.792	236.862	0.0177187	0.742433
Ccdc96	56.391	61.982	57.8246	59.8787	78.5675	82.7547	91.5657	65.7428	0.0280061	0.740909
Parvb	275.09	397.49	434.921	418.663	545.253	543.962	527.714	443.266	0.0265503	0.740786
Olfr1193	47.4698	47.7606	45.6175	62.0741	85.5308	65.7154	63.957	59.4136	0.0471728	0.738928
Gm19958	57.8274	40.9573	62.0449	58.0144	82.3198	70.2626	76.0662	67.9096	0.0171661	0.737946
Fam111a	204.806	286.242	235.072	237.485	396.791	280.616	295.365	336.533	0.037311	0.735967
BC034090	102.075	88.5957	72.7763	96.1809	145.746	126.007	104.764	113.193	0.02816	0.73437
Rnpep	163.109	181.835	162.135	198.107	249.806	244.283	254.671	213.764	0.00221918	0.732641
Nop56	49.4569	41.9465	47.0875	47.668	54.4372	65.3254	56.4058	77.952	0.0452315	0.732562
Lrrn3	100.783	102.563	84.9034	114.417	127.547	127.376	140.159	155.962	0.0066432	0.730734
H2afv	326.351	351.726	372.086	413.81	453.363	571.679	496	485.389	0.00582369	0.729641
Snf8	105.977	165.338	149.463	196.053	186.275	223.806	230.724	207.144	0.0459417	0.727437
Cyp2j9	138.702	159.989	161.152	190.181	217.505	280.261	197.843	199.112	0.0427035	0.726509
Trappc6b	531.736	537.148	795.423	684.639	829.09	864.349	1020.47	795.425	0.0264986	0.726334
Sez6l2	57.3442	63.6226	52.7223	61.0559	89.1523	71.1843	86.3916	77.4577	0.00598051	0.724107
Cd38	241.311	368.862	435.001	361.75	524.376	412.306	487.505	528.186	0.0356036	0.720623
Ino80c	141.112	135.34	91.3022	134.517	134.979	177.168	179.143	205.844	0.0419075	0.720479
Stard10	132.824	143.884	142.327	148.467	200.101	190.127	217.622	182.683	0.00228634	0.717872
Gpatch8	124.227	119.335	108.961	121.142	183.519	184.667	126.122	166.24	0.0382297	0.717079
Limd1	687.468	1044.04	1050.16	1038.67	1595.19	1151.12	1241.5	1385.09	0.0258869	0.711037
Ccdc50	446.773	511.196	397.255	520.46	677.019	697.086	592.393	673.79	0.00242548	0.710409
Kpna2	111.058	103.345	129.736	160.297	161.091	210.84	160.373	179.569	0.0243876	0.708604
Cacybp	590.757	673.873	571.397	565.132	847.593	722.956	882.1	939.985	0.00620739	0.707757
Slmo2	227.277	276.989	332.75	350.188	460.647	435.851	421.971	367.7	0.0129238	0.704084
Slc31a2	382.948	349.251	359.778	320.384	394.351	580.595	578.44	456.604	0.0434752	0.702671
Sympk	240.304	265.704	322.143	276.798	375.279	405.341	416.289	382.589	0.00217575	0.699557
Nck2	109.085	117.418	145.698	117.631	166.314	154.741	173.156	208.099	0.0111643	0.697459
Fkbp7	385.188	458.13	438.994	355.211	453.336	563.706	672.85	662.333	0.0313943	0.696159
Gm14431	469.245	679.309	702.209	731.374	950.512	1032.9	821.876	908.307	0.0103449	0.695321
Eml1	157.451	173.588	210.019	189.649	305.497	310.571	224.35	211.5	0.0468767	0.694642
Galnt6	140.63	170.918	162.905	136.23	254.208	186.356	234.634	204.922	0.012976	0.693864
Rabl2	122.187	95.401	110.25	114.457	179.016	159.416	155.365	153.143	0.000770663	0.683673
Kpna6	232.375	244.85	283.814	370.889	444.723	360.264	437.131	418.558	0.0156322	0.681607
Gfra2	78.1035	86.4059	86.253	88.808	138.656	143.53	114.483	103.089	0.0222991	0.679469
I730030J21Rik	156.521	125.925	191.701	182.993	190.238	294.683	241.175	242.202	0.027792	0.678654
Nf2	239.718	241.158	162.87	269.885	347.243	323.416	355.764	324.559	0.0126341	0.676272
Fam165b	206.84	253.797	234.406	211.279	330.145	396.982	281.499	335.235	0.0122728	0.674416
Nenf	215.16	349.762	230.718	212.111	315.102	409.926	388.523	384.328	0.0248177	0.672786
Pdia4	488.763	518.153	517.805	567.232	620.66	853.832	857.714	815.699	0.0145657	0.664554
Mmp16	168.107	296.157	283.891	353.71	473.421	409.169	378.776	399.631	0.0280321	0.663376
Sh3bp5	218.24	309.768	306.356	330.723	356.472	477.413	435.758	494.186	0.00988426	0.660545
Epha5	71.8292	105.68	97.5499	119.245	164.717	179.886	126.219	132.494	0.0198744	0.653562
Tnfrsf21	213.194	267.42	268.671	311.171	386.602	362.81	410.717	468.229	0.00346237	0.651243
Bcl2	264.387	437.027	384.217	291.202	621.384	550.247	438.027	522.51	0.0142631	0.645743
Fgf1	381.469	534.33	468.31	470.307	924.383	775.344	529.694	661.569	0.0468839	0.641447
Atp1b2	461.433	764.736	1064.2	873.318	1211.03	1369.54	1151.49	1211.24	0.0319247	0.639993
Trmt61a	83.7964	66.9517	93.9261	94.2577	155.207	114.976	128.813	138.19	0.00409118	0.630941
Fxyd5	1212.95	1912.99	1848.84	1676.55	2404.69	1979.53	3106.76	3196.61	0.0314705	0.622342
Cmtm5	381.059	448.712	554.299	549.806	681.607	907.84	852.067	738.26	0.00378885	0.60818
Gm3579	251.943	167.004	307.976	231.798	447.688	490.62	278.409	417.125	0.0261417	0.586789
Prima1	55.5075	65.3681	74.6626	69.2565	126.794	113.029	109.736	110.31	0.000138741	0.575804
Cnp	167.836	86.688	196.727	125.57	210.639	244.431	276.626	280.649	0.0121819	0.569787
Id4	399.086	532.787	847.48	747.199	1120.83	1165.17	1093.03	1193.48	0.0129155	0.552553
Zfp781	82.9714	134.605	129.349	93.7894	228.923	221.833	173.643	188.017	0.0023745	0.542475
Ccl21a	135.98	69.0355	139.028	144.556	307.082	171.927	209.006	250.248	0.0214782	0.520749
Dhh	148.402	296.519	258.534	357.605	561.933	432.039	596.839	596.338	0.00316504	0.485134
Ccl21c	73.7226	63.0615	94.11	97.8928	188.055	132.547	182.016	193.48	0.0026509	0.472329
Ccl21b	128.689	65.9452	128.607	131.554	307.829	149.57	231.827	273.664	0.0254979	0.472323
